# Supplementary material for: Synthesis of 1,2,4,5-tetra-substituted benzenes via copper-catalyzed dimerization of γ,δ-unsaturated ketones
Source: Royal Society of Chemistry journal article supplement (doi:10.1039/d4cc02458c), 2024-01-01

## Supporting Information

# Synthesis of 1,2,4,5-*Tetra*-Substituted Benzenes via Copper-Catalyzed Dimerization of $\gamma,\delta$ -Unsaturated ketones

Kai-Xian Ma, Chuan-Ming Hong, Jiang-Min Yan, Tang-Lin Liu,\* and Qing-Hua Li \*

School of Chemistry and Chemical Engineering, Southwest University, Chongqing  
400715, China.

### Table of contents

|                                                             |    |
|-------------------------------------------------------------|----|
| I General information.....                                  | 2  |
| II General procedure .....                                  | 2  |
| III The analytical and spectral characterization data ..... | 4  |
| IV NMR spectra .....                                        | 16 |

## I General information

$^1\text{H}$  NMR and  $^{13}\text{C}$  NMR spectra were recorded on a Bruker Avance 600 MHz instruments. Chemical shifts were reported in parts per million (ppm), and the residual solvent peak was used as an internal reference: proton (chloroform  $\delta$  7.26), carbon (chloroform  $\delta$  77.16) or tetramethylsilane (TMS  $\delta$  0.00) was used as a reference. Multiplicity was indicated as follows: s (singlet), d (doublet), t (triplet), q (quartet), m (multiplet), dd (doublet of doublet), bs (broad singlet). Coupling constants were reported in Hertz (Hz). All high resolution mass spectra (HRMS) were obtained on a Bruker Apex-2. For thin layer chromatography (TLC), Qingdao Haiyang Chemical was used, and compounds were visualized with a UV light at 254 nm. Further visualization was achieved by staining with iodine, or potassium permanganate solution followed by heating using a heat gun. Flash chromatography separations were performed on Qingdao Haiyang Chemical 200-300 mesh silica gel. All reactions were carried out under a nitrogen atmosphere. All commercially available reagents were used as received for the reactions without any purification. All solvents were dried on alumina columns using a solvent dispensing system.

## II General procedure

### General procedure for preparation of $\gamma,\delta$ -unsaturated ketones

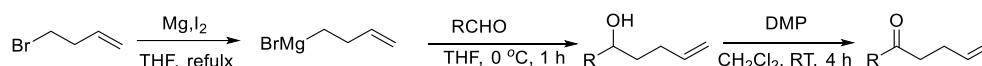

Step 1: To a 150 mL flame-dried and nitrogen-flushed, three-necked, round-bottomed flask equipped with a stirring bar was charged with Mg turnings and a grain of iodine, a constant pressure funnel was charged with 4-bromo-1-butene (26 mmol, 1.3 equiv.) solubilized in anhydrous 1.0 M THF and a condenser. 4-bromo-1-butene (26 mmol, 1.3 equiv.) in anhydrous 1.0 M THF was dropwise added to magnesium turnings (28 mmol, 1.4 equiv.) and a grain of iodine in THF (20 mL) which have preheating by heat gun, at such a rate to maintain a gentle reflux. Then, the freshly prepared solution of but-3-en-1-ylmagnesium bromide was slowly added to the aldehyde (20 mmol, 1.0 equiv.) in 0.25 M THF via a syringe dropwise under 0 °C. The mixture was allowed to warm to room temperature and stirred for 2 h. Saturated aqueous  $\text{NH}_4\text{Cl}$  was added,

and the mixture was diluted with ethyl acetate (EA). The layers were separated, and the organic layer was dried ( $\text{Na}_2\text{SO}_4$ ), filtered and evaporated. Purification by column chromatography on silica gel.

Step 2: To a 100 mL flame-dried round-bottom flask equipped with a stir-bar was added Dess-Martin Periodinane (DMP) (18 mmol, 1.2 equiv.). It was solubilized in anhydrous 0.25 M DCM and stirred at room temperature. Then, the corresponding alcohol (15 mmol, 1.0 equiv.) was slowly added via a syringe and stirred for 4 hours. Saturated aqueous  $\text{NaHCO}_3$  was added, and the mixture was diluted with ethyl acetate (EA). The layers were separated, and the organic layer was dried ( $\text{Na}_2\text{SO}_4$ ), filtered and evaporated. Purification by column chromatography on silica gel to afford the corresponding ketones.

#### General procedure for the synthesis of 1,2,4,5-tetra-substituted benzenes

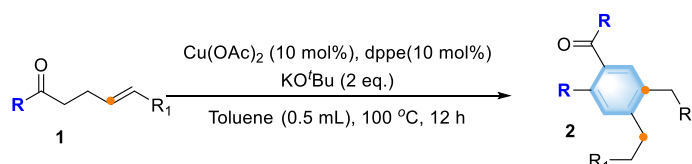

To a vial equipped with a dried stir bar was added unsaturated ketones **1** (0.1 mmol),  $\text{Cu}(\text{OAc})_2$  (10 mol%), dppe (20 mol%),  $\text{KO}^t\text{Bu}$  (2.0 equiv), toluene (0.5 mL) in the glovebox. The reaction mixture was taken outside the glovebox and allowed to stir at 100 °C (oil bath) for 12 h. The reaction mixture was added to water (10 mL), and extracted with EtOAc ( $3 \times 5$  mL). The organic layer was washed with aqueous  $\text{NaHCO}_3$  and brine and dried over  $\text{Na}_2\text{SO}_4$ . And the residue was purified by column chromatography with silica gel to give pure products **2**.

### III The analytical and spectral characterization data

#### (5-Ethyl-4-methyl-[1,1'-biphenyl]-2-yl)(phenyl)methanone (2a)

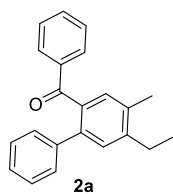

The title compound was prepared according to the general procedure as described, silica gel flash column chromatography was performed using hexanes and ethyl acetate (30:1) ( $R_f = 0.40$  in hexane:ethyl acetate = 15:1) resulting in 10.5 mg of yellow oil in 75% yield.

$^1\text{H NMR}$  (600 MHz,  $\text{CDCl}_3$ )  $\delta$  7.65 (d,  $J = 7.2$  Hz, 2H), 7.37 (t,  $J = 7.2$  Hz, 1H), 7.30 (s, 1H), 7.24-7.23 (m, 3H), 7.17 (t,  $J = 7.2$  Hz, 2H), 7.11 (t,  $J = 7.2$  Hz, 1H), 2.74 (q,  $J = 7.8$  Hz, 2H), 2.38 (s, 3H), 1.29 (t,  $J = 7.8$  Hz, 3H).

$^{13}\text{C NMR}$  (151 MHz,  $\text{CDCl}_3$ )  $\delta$  199.1, 145.2, 140.6, 139.2, 137.8, 136.5, 135.0, 132.7, 130.7, 130.1, 129.8, 129.1, 128.3, 128.1, 127.1, 26.4, 18.9, 14.4.

**HRMS(ESI):**  $m/z$  Calcd. for  $\text{C}_{22}\text{H}_{20}\text{O}$   $[\text{M}+\text{H}]^+$ : 301.1587; Found: 301.1586.

#### (5-Ethyl-4-methyl-4'-(trifluoromethyl)-[1,1'-biphenyl]-2-yl)(4-(trifluoromethyl)phenyl)methanone (2b)

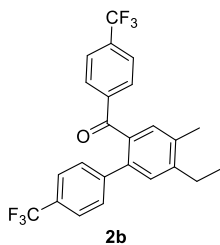

The title compound was prepared according to the general procedure as described, silica gel flash column chromatography was performed using hexanes and ethyl acetate (30:1) ( $R_f = 0.40$  in hexane:ethyl acetate = 15:1) resulting in 12.5 mg of yellow oil in 71% yield.

$^1\text{H NMR}$  (600 MHz,  $\text{CDCl}_3$ )  $\delta$  7.73 (d,  $J = 7.8$  Hz, 2H), 7.54 (d,  $J = 8.4$  Hz, 2H), 7.45 (d,  $J = 8.4$  Hz, 2H), 7.37-7.29 (m, 3H), 7.26 (s, 1H), 2.76 (q,  $J = 7.8$  Hz, 2H), 2.41 (s, 3H), 1.30 (t,  $J = 7.2$  Hz, 3H).

$^{13}\text{C NMR}$  (151 MHz,  $\text{CDCl}_3$ )  $\delta$  197.4, 146.3, 144.1, 140.7, 138.3, 136.2, 135.6, 131.2, 130.2, 130.0, 129.6, 129.5, 125.4, 125.3, 125.3, 125.3, 26.4, 19.1, 14.3.

$^{19}\text{F NMR}$  (376 MHz,  $\text{CDCl}_3$ )  $\delta$  -62.73, -63.27.

**HRMS(ESI):**  $m/z$  Calcd. for  $\text{C}_{24}\text{H}_{18}\text{F}_6\text{O}$   $[\text{M}+\text{Na}]^+$ : 459.1154; Found: 459.1152.

#### (4'-Chloro-5-ethyl-4-methyl-[1,1'-biphenyl]-2-yl)(4-chlorophenyl)methanone (2c)

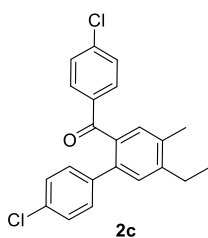

The title compound was prepared according to the general procedure as described, silica gel flash column chromatography was performed using hexanes and ethyl acetate (30:1) ( $R_f = 0.40$  in hexane:ethyl acetate = 15:1) resulting in 8.6 mg of yellow oil in 47% yield.

$^1\text{H NMR}$  (400 MHz,  $\text{CDCl}_3$ )  $\delta$  7.66 (d,  $J = 6.8$  Hz, 1H), 7.43 (t,  $J = 7.4$  Hz, 1H), 7.31-7.23 (m, 4H), 7.19-7.14 (m, 4H), 2.74 (q,  $J = 7.6$  Hz, 2H), 2.37 (s, 3H), 1.28 (t,  $J = 7.2$  Hz, 3H).

$^{13}\text{C NMR}$  (101 MHz,  $\text{CDCl}_3$ )  $\delta$  198.9, 145.3, 139.2, 137.8, 136.4, 135.4, 133.3, 133.0, 130.8, 130.4, 130.1, 129.7, 128.5, 128.3, 26.4, 18.9, 14.4.

**HRMS(ESI):**  $m/z$  Calcd. for  $\text{C}_{12}\text{H}_{18}\text{Cl}_2\text{O}$   $[\text{M}+\text{H}]^+$ : 369.0807; Found: 369.0805.

**(5-Ethyl-4'-fluoro-4-methyl-[1,1'-biphenyl]-2-yl)(4-fluorophenyl)methanone (2d)**

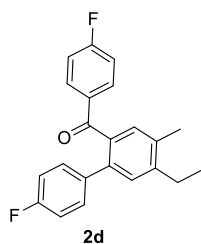

The title compound was prepared according to the general procedure as described, silica gel flash column chromatography was performed using hexanes and ethyl acetate (30:1) ( $R_f = 0.50$  in hexane:ethyl acetate = 15:1) resulting in 7.9 mg of yellow oil in 47% yield.

$^1\text{H NMR}$  (600 MHz,  $\text{CDCl}_3$ )  $\delta$  7.64 (m, 2H), 7.28 (s, 1H), 7.21 (s, 1H), 7.20-7.17 (m, 2H), 6.93 (t,  $J = 8.4$  Hz, 2H), 6.88 (t,  $J = 8.4$  Hz, 2H), 2.74 (q,  $J = 7.8$  Hz, 2H), 2.38 (s, 3H), 1.29 (t,  $J = 7.8$  Hz, 3H).

$^{13}\text{C NMR}$  (151 MHz,  $\text{CDCl}_3$ )  $\delta$  197.5, 166.4, 164.7, 163.0, 161.4, 145.4, 138.0, 136.6, 136.5, 135.4, 134.2, 132.6, 30.66, 130.7, 129.7, 128.2, 115.4, 26.40, 18.93, 14.35.

$^{19}\text{F NMR}$  (376 MHz,  $\text{CDCl}_3$ )  $\delta$  -105.46.

**HRMS(ESI):**  $m/z$  Calcd. for  $\text{C}_{22}\text{H}_{18}\text{F}_2\text{O}$   $[\text{M}+\text{H}]^+$ : 337.1398; Found: 337.1396.

**(4'-Bromo-5-ethyl-4-methyl-[1,1'-biphenyl]-2-yl)(4-bromophenyl)methanone (2e)**

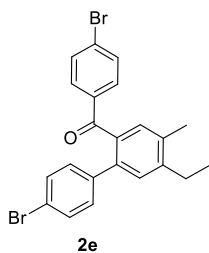

The title compound was prepared according to the general procedure as described, silica gel flash column chromatography was performed using hexanes and ethyl acetate (30:1) ( $R_f = 0.40$  in hexane:ethyl acetate = 10:1) resulting in 7.3 mg of yellow oil in 32% yield.

$^1\text{H NMR}$  (400 MHz,  $\text{CDCl}_3$ )  $\delta$  7.67-7.64 (m, 1H), 7.46-7.42 (m, 1H), 7.32-7.26 (m, 4H), 7.24-7.19 (m, 2H), 7.14-7.09 (m, 2H), 2.73 (q,  $J = 7.6$  Hz, 3H), 2.37 (s, 3H), 1.26 (t,  $J = 7.8$  Hz, 3H).

$^{13}\text{C NMR}$  (101 MHz,  $\text{CDCl}_3$ )  $\delta$  198.7, 145.3, 139.6, 137.7, 135.4, 133.0, 131.4, 130.9, 130.7, 130.1, 129.7, 129.1, 128.3, 121.5, 26.4, 19.0, 14.4.

**HRMS(ESI):**  $m/z$  Calcd. for  $\text{C}_{22}\text{H}_{18}\text{Br}_2\text{O}$   $[\text{M}+\text{H}]^+$ : 456.9797; Found: 453.9795.

**[1,1'-Biphenyl]-4-yl(5-ethyl-4-methyl-[1,1':4',1''-terphenyl]-2-yl)methanone (2f)**

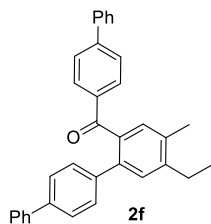

The title compound was prepared according to the general procedure as described, silica gel flash column chromatography was performed using hexanes and ethyl acetate (40:1) ( $R_f = 0.40$  in hexane:ethyl acetate = 15:1) resulting in 13.1 mg of yellow oil in 58% yield.

$^1\text{H NMR}$  (400 MHz,  $\text{CDCl}_3$ )  $\delta$  7.77 (d,  $J = 12$  Hz, 2H), 7.58-7.46 (m, 6H), 7.46-7.39 (m, 5H), 7.39-7.31 (m, 7H), 2.77 (q,  $J = 7.2$  Hz, 2H), 2.40 (s, 3H), 1.30 (t,  $J = 7.2$  Hz, 3H).

$^{13}\text{C NMR}$  (101 MHz,  $\text{CDCl}_3$ )  $\delta$  198.6, 145.5, 145.2, 140.9, 140.2, 140.0, 139.7, 138.9, 136.7, 136.6, 135.1, 130.8, 130.7, 129.9, 129.6, 129.1, 129.0, 128.9, 128.8, 128.2, 127.4, 127.3, 127.2, 127.1, 126.9, 26.5, 19.0, 14.4.

**HRMS(ESI):**  $m/z$  Calcd. for  $\text{C}_{38}\text{H}_{28}\text{O}$   $[\text{M}+\text{H}]^+$ : 453.2213; Found: 453.2214.

**(5-Ethyl-4-methyl-4'-(trifluoromethoxy)-[1,1'-biphenyl]-2-yl)(4-(trifluoromethoxy)phenyl)methanone (2g)**

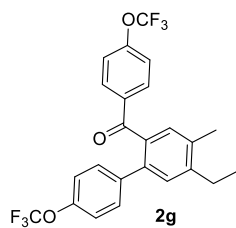

The title compound was prepared according to the general procedure as described, silica gel flash column chromatography was performed using hexanes and ethyl acetate (30:1) ( $R_f = 0.40$  in hexane:ethyl acetate = 15:1) resulting in 9.6 mg of yellow solid in 41% yield.

$^1\text{H NMR}$  (600 MHz,  $\text{CDCl}_3$ )  $\delta$  7.62 (d,  $J = 8.4$  Hz, 2H), 7.34 (s, 1H), 7.21 (t,  $J = 9$  Hz, 3H), 7.06 (d,  $J = 7.2$  Hz, 2H), 7.02 (d,  $J = 7.8$  Hz, 2H), 2.75 (q,  $J = 7.2$  Hz, 2H), 2.40 (s, 3H), 1.27 (t,  $J = 7.8$  Hz, 3H).

$^{13}\text{C NMR}$  (151 MHz,  $\text{CDCl}_3$ )  $\delta$  197.3, 152.3, 145.9, 139.2, 137.9, 136.2, 136.0, 135.9, 131.8, 130.9, 130.5, 129.7, 120.8, 120.0, 26.4, 19.0, 14.3.

$^{19}\text{F NMR}$  (376 MHz,  $\text{CDCl}_3$ )  $\delta$  -57.78, -58.07.

**HRMS(ESI):**  $m/z$  Calcd. for  $\text{C}_{24}\text{H}_{18}\text{F}_6\text{O}_3$   $[\text{M}+\text{Na}]^+$ : 491.1052; Found: 491.1051.

**(5-Ethyl-4'-methoxy-4-methyl-[1,1'-biphenyl]-2-yl)(4-methoxyphenyl)methanone (2h)**

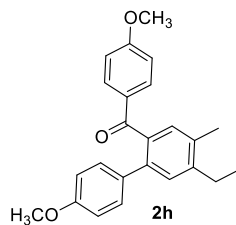

The title compound was prepared according to the general procedure as described, silica gel flash column chromatography was performed using hexanes and ethyl acetate (20:1) ( $R_f = 0.40$  in hexane:ethyl acetate = 10:1) resulting in 10.1 mg of yellow oil in 56% yield.

$^1\text{H NMR}$  (600 MHz,  $\text{CDCl}_3$ )  $\delta$  7.66 (d,  $J = 7.8$  Hz, 2H), 7.22-7.18 (m, 4H), 6.74 (t,  $J = 9.6$  Hz, 4H), 3.80 (s, 3H), 3.73 (s, 3H), 2.74 (q,  $J = 7.8$  Hz, 2H), 2.35 (s, 3H), 1.27 (t,  $J = 7.2$  Hz, 3H).

$^{13}\text{C NMR}$  (151 MHz,  $\text{CDCl}_3$ )  $\delta$  198.0, 163.3, 158.8, 144.6, 138.3, 136.7, 134.5, 133.2, 132.5, 130.8, 130.3, 130.1, 129.6, 113.8, 113.4, 55.5, 55.3, 26.4, 18.9, 14.4.

**HRMS(ESI):**  $m/z$  Calcd. for  $\text{C}_{24}\text{H}_{24}\text{O}_3$   $[\text{M}+\text{Na}]^+$ : 383.1618; Found: 383.1615.

**(5-Ethyl-4,4'-dimethyl-[1,1'-biphenyl]-2-yl)(p-tolyl)methanone (2i)**

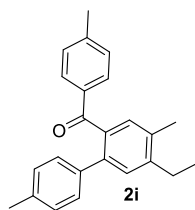

The title compound was prepared according to the general procedure as described, silica gel flash column chromatography was performed using hexanes and ethyl acetate (30:1) ( $R_f = 0.50$  in hexane:ethyl acetate = 15:1) resulting in 10 mg of yellow oil in 61% yield.

$^1\text{H NMR}$  (600 MHz,  $\text{CDCl}_3$ )  $\delta$  7.61 (d,  $J = 7.8$  Hz, 2H), 7.24-7.22 (m, 2H), 7.15 (d,  $J = 7.8$  Hz, 2H), 7.09 (d,  $J = 7.8$  Hz, 2H), 7.00 (d,  $J = 7.8$  Hz, 2H), 2.72 (q,  $J = 7.8$  Hz, 2H), 2.35 (s, 3H), 2.33 (s, 3H), 2.25 (s, 3H), 1.28 (t,  $J = 7.5$  Hz, 3H).

$^{13}\text{C NMR}$  (151 MHz,  $\text{CDCl}_3$ )  $\delta$  198.8, 144.8, 143.6, 139.0, 137.8, 136.7, 136.6, 135.3, 134.5, 130.8, 130.4, 129.9, 129.1, 128.9, 128.9, 26.4, 21.8, 21.2, 18.9, 14.4.

**HRMS(ESI):**  $m/z$  Calcd. for  $\text{C}_{24}\text{H}_{24}\text{O}$   $[\text{M}+\text{Na}]^+$ : 351.1719; Found: 351.1714.

**(5-Ethyl-4-methyl-4'-(methylthio)-[1,1'-biphenyl]-2-yl)(4-(methylthio)phenyl)methanone (2j)**

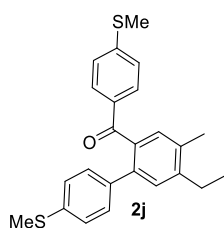

The title compound was prepared according to the general procedure as described, silica gel flash column chromatography was performed using hexanes and ethyl acetate (30:1) ( $R_f = 0.40$  in hexane:ethyl acetate = 15:1) resulting in 10.1 mg of yellow solid in 51% yield.

$^1\text{H NMR}$  (600 MHz,  $\text{CDCl}_3$ )  $\delta$  7.59 (d,  $J = 8.4$  Hz, 2H), 7.23 (s, 2H), 7.17 (d,  $J = 8.4$  Hz, 2H), 7.09 (d,  $J = 6.6$  Hz, 4H), 2.72 (q,  $J = 7.8$  Hz, 2H), 2.46 (s, 3H), 2.41 (s, 3H), 2.36 (s, 3H), 1.28 (t,  $J = 7.2$  Hz, 3H).

$^{13}\text{C NMR}$  (151 MHz,  $\text{CDCl}_3$ )  $\delta$  198.0, 145.7, 145.0, 138.4, 137.6, 137.5, 136.5, 135.0, 134.2, 130.5, 130.5, 129.7, 129.5, 126.8, 124.8, 26.4, 18.9, 16.1, 15.0, 14.4.

**HRMS(ESI):**  $m/z$  Calcd. for  $\text{C}_{24}\text{H}_{24}\text{OS}_2$   $[\text{M}+\text{Na}]^+$ : 415.1161; Found: 415.1162.

**(5-Ethyl-4,4'-dimethyl-[1,1'-biphenyl]-2-yl)(p-tolyl)methanone (2k)**



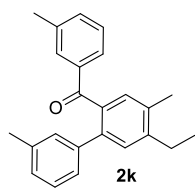

The title compound was prepared according to the general procedure as described, silica gel flash column chromatography was performed using hexanes and ethyl acetate (20:1) ( $R_f = 0.40$  in hexane:ethyl acetate = 15:1) resulting in 10.5 mg of yellow oil in 64% yield.

$^1\text{H NMR}$  (400 MHz,  $\text{CDCl}_3$ )  $\delta$  7.45-7.43 (m, 1H), 7.29-7.25 (m, 3H), 7.19-7.11 (m, 2H), 7.06-7.02 (m, 2H), 6.92 (d,  $J = 7.2$  Hz, 1H), 2.74 (q,  $J = 7.6$  Hz, 2H), 2.37 (s, 3H), 2.26 (s, 3H), 2.23 (s, 3H), 1.29 (t,  $J = 7.6$  Hz, 3H).

$^{13}\text{C NMR}$  (101 MHz,  $\text{CDCl}_3$ )  $\delta$  199.3, 145.1, 140.7, 139.5, 137.9, 137.7, 137.7, 136.6, 134.9, 133.3, 130.8, 130.5, 129.9, 129.7, 128.1, 127.9, 127.8, 127.3, 126.2, 30.0, 26.4, 21.4, 18.9, 14.4.

**HRMS(ESI):**  $m/z$  Calcd. for  $\text{C}_{24}\text{H}_{24}\text{O}$   $[\text{M}+\text{H}]^+$ : 329.1900; Found: 329.1896.

#### (5-Ethyl-2',4-dimethyl-[1,1'-biphenyl]-2-yl)(o-tolyl)methanone (2l)

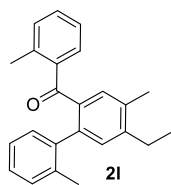

The title compound was prepared according to the general procedure as described, silica gel flash column chromatography was performed using hexanes and ethyl acetate (30:1) ( $R_f = 0.40$  in hexane:ethyl acetate = 15:1) resulting in 9.7 mg of yellow oil in 59% yield.

$^1\text{H NMR}$  (600 MHz,  $\text{CDCl}_3$ )  $\delta$  7.37 (s, 1H), 7.17-7.14 (m, 3H), 7.05-6.94 (m, 6H), 2.70 (q,  $J = 7.6$  Hz, 2H), 2.38 (s, 3H), 2.26 (s, 3H), 2.08 (s, 3H), 1.30 (t,  $J = 7.8$  Hz, 3H).

$^{13}\text{C NMR}$  (101 MHz,  $\text{CDCl}_3$ )  $\delta$  200.6, 145.4, 139.4, 139.2, 138.1, 135.5, 134.8, 131.2, 131.1, 130.7, 130.3, 130.1, 129.9, 129.8, 127.2, 125.2, 124.7, 29.9, 26.3, 20.4, 19.0, 14.2.

**HRMS(ESI):**  $m/z$  Calcd. for  $\text{C}_{24}\text{H}_{24}\text{O}$   $[\text{M}+\text{H}]^+$ : 329.1900; Found: 329.1895.

#### (4-Ethyl-5-methyl-2-(naphthalen-2-yl)phenyl)(naphthalen-2-yl)methanone (2m)

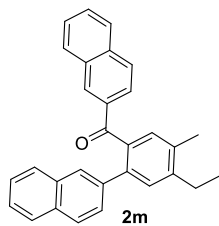

The title compound was prepared according to the general procedure as described, silica gel flash column chromatography was performed using hexanes and ethyl acetate (30:1) ( $R_f = 0.30$  in hexane:ethyl acetate = 15:1) resulting in 7.6 mg of yellow solid in 38% yield.

$^1\text{H NMR}$  (600 MHz,  $\text{CDCl}_3$ )  $\delta$  8.15 (s, 1H), 7.85 (d,  $J = 7.8$  Hz, 1H), 7.80-7.75 (m, 2H), 7.73 (d,  $J = 7.8$  Hz, 1H), 7.69 (t,  $J = 6$  Hz, 2H), 7.64 (d,  $J = 7.8$  Hz, 1H), 7.60 (d,  $J = 8.4$  Hz, 1H), 7.50-7.47 (m, 1H), 7.44-7.40 (m, 3H), 7.39-7.30 (m, 3H), 2.80 (q,  $J = 7.2$  Hz, 2H), 2.42 (s, 3H), 1.34 (t,  $J = 7.8$  Hz, 3H).

$^{13}\text{C NMR}$  (151 MHz,  $\text{CDCl}_3$ )  $\delta$  198.9, 145.2, 139.3, 138.2, 136.8, 135.5, 135.2, 135.1, 133.3, 132.4, 132.4, 132.3, 130.9, 130.3, 129.6, 128.4, 128.2, 128.1, 128.0, 127.9, 127.8, 127.6, 127.2, 126.6, 126.2, 125.9, 125.2, 26.5, 19.0, 14.4.

**HRMS(ESI):**  $m/z$  Calcd. for  $\text{C}_{30}\text{H}_{24}\text{O}$   $[\text{M}+\text{H}]^+$ : 401.1900; Found: 401.1902.

### (5-Benzyl-2-(naphthalen-2-yl)-4-phenethylphenyl)(naphthalen-2-yl)methanone

#### (2n)

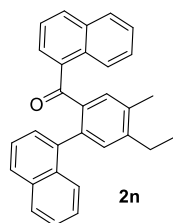

The title compound was prepared according to the general procedure as described, silica gel flash column chromatography was performed using hexanes and ethyl acetate (30:1) ( $R_f = 0.50$  in hexane:ethyl acetate = 15:1) resulting in 7.6 mg of yellow oil in 40% yield.

$^1\text{H NMR}$  (600 MHz,  $\text{CDCl}_3$ )  $\delta$  7.94 (d,  $J = 9$  Hz, 1H), 7.70 (s, 1H), 7.63-7.62 (m, 1H), 7.55 (d,  $J = 8.4$  Hz, 1H), 7.51-7.50 (m, 1H), 7.44 (d,  $J = 8.4$  Hz, 1H), 7.32-7.30 (m, 2H), 7.28-7.20 (m, 4H), 7.02 (d,  $J = 6.6$  Hz, 1H), 6.90-6.84 (m, 2H), 2.77 (q,  $J = 7.8$  Hz, 2H), 2.48 (s, 3H), 1.28 (t,  $J = 7.2$  Hz, 3H).

$^{13}\text{C NMR}$  (151 MHz,  $\text{CDCl}_3$ )  $\delta$  200.4, 145.9, 139.7, 138.6, 138.4, 136.8, 135.6, 133.3, 131.9, 131.6, 131.2, 131.1, 130.2, 128.8, 128.1, 127.9, 127.8, 127.1, 127.1, 126.3, 126.0, 125.9, 125.6, 125.6, 124.7, 123.5, 26.5, 19.1, 14.3.

**HRMS(ESI):**  $m/z$  Calcd. for  $\text{C}_{30}\text{H}_{24}\text{O}$   $[\text{M}+\text{Na}]^+$ : 423.1719; Found: 423.1721.

**(3,5-Difluorophenyl)(5-ethyl-3',5'-difluoro-4-methyl-[1,1'-biphenyl]-2-yl)methanone (2o)**

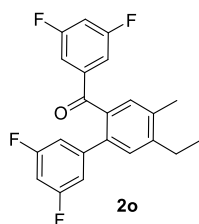

The title compound was prepared according to the general procedure as described, silica gel flash column chromatography was performed using hexanes and ethyl acetate (40:1) ( $R_f = 0.40$  in hexane:ethyl acetate = 10:1) resulting in 7.5 mg of yellow oil in 40% yield.

$^1\text{H NMR}$  (400 MHz,  $\text{CDCl}_3$ )  $\delta$  7.40 (s, 1H), 7.26 (s, 1H), 7.18-7.16 (m, 1H), 7.04 (s, 1H), 6.93-6.90 (m, 2H), 6.71-6.60 (m, 2H), 2.68 (q,  $J = 7.6$  Hz, 2H), 2.29 (s, 3H), 1.28 (t,  $J = 7.6$  Hz, 3H).

$^{13}\text{C NMR}$  (101 MHz,  $\text{CDCl}_3$ )  $\delta$  199.1, 164.5, 164.3, 162.0, 161.9, 147.6, 146.6, 144.6, 138.5, 126.0, 120.4, 108.7, 108.4, 103.9, 103.7, 103.6, 103.3, 103.1, 102.8, 82.4, 26.5, 19.8, 14.4.

$^{19}\text{F NMR}$  (376 MHz, Chloroform-*d*)  $\delta$  -109.50.

**HRMS(ESI):**  $m/z$  Calcd. for  $\text{C}_{22}\text{H}_{16}\text{F}_4\text{O}$   $[\text{M}+\text{H}]^+$ : 373.1210; Found: 373.1215.

**(3,4-Dimethoxyphenyl)(5-ethyl-3',4'-dimethoxy-4-methyl-[1,1'-biphenyl]-2-yl)-methanone (2p)**

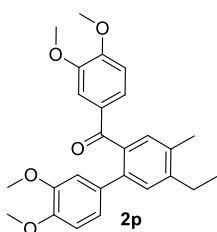

The title compound was prepared according to the general procedure as described, silica gel flash column chromatography was performed using hexanes and ethyl acetate (30:1) ( $R_f = 0.50$  in hexane:ethyl acetate = 5:1) resulting in 11.1 mg of yellow oil in 53% yield.

$^1\text{H NMR}$  (400 MHz,  $\text{CDCl}_3$ )  $\delta$  7.37 (s, 1H), 7.30 (d,  $J = 4.3$  Hz, 1H), 7.25-7.19 (m, 2H), 6.85-6.79 (m, 2H), 6.73-6.71 (m, 2H), 3.87 (s, 3H), 3.84 (s, 3H), 3.80 (s, 3H), 3.73 (s, 3H), 2.74 (q,  $J = 7.6$  Hz, 2H), 2.37 (s, 3H), 1.29 (t,  $J = 7.2$  Hz, 3H).

$^{13}\text{C NMR}$  (101 MHz,  $\text{CDCl}_3$ )  $\delta$  198.1, 153.2, 148.9, 148.7, 148.3, 144.6, 138.4, 136.8, 134.7, 133.6, 130.9, 130.2, 129.5, 125.8, 121.2, 112.7, 111.5, 111.2, 109.8, 56.1, 55.9, 18.9, 14.4, 14.2.

**HRMS(ESI):**  $m/z$  Calcd. for  $\text{C}_{26}\text{H}_{28}\text{O}_5$   $[\text{M}+\text{H}]^+$ : 421.2010; Found: 421.1012.

**(2,3-Dihydrobenzo[b][1,4]dioxin-6-yl)(2-(2,3-dihydrobenzo[b][1,4]dioxin-6-yl)-4-ethyl-5-methylphenyl)methanone (2q)**

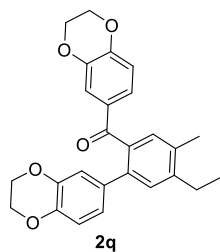

The title compound was prepared according to the general procedure as described, silica gel flash column chromatography was performed using hexanes and ethyl acetate (30:1) ( $R_f = 0.40$  in hexane:ethyl acetate = 15:1) resulting in 12 mg of yellow oil in 58% yield.

$^1\text{H NMR}$  (600 MHz,  $\text{CDCl}_3$ )  $\delta$  7.30-7.22 (m, 2H), 7.19 (d,  $J = 12.6$  Hz, 2H), 6.80 (s, 1H), 6.75 (d,  $J = 8.4$  Hz, 1H), 6.73-6.67 (m, 2H), 4.30-4.17 (m, 8H), 2.70 (q,  $J = 7.5$  Hz, 2H), 2.33 (s, 3H), 1.27 (t,  $J = 7.8$  Hz, 3H).

$^{13}\text{C NMR}$  (151 MHz,  $\text{CDCl}_3$ )  $\delta$  197.5, 147.8, 144.6, 143.3, 143.1, 142.9, 138.3, 136.5, 134.5, 134.3, 131.8, 130.3, 129.7, 124.5, 122.4, 119.6, 117.9, 117.1, 116.9, 64.8, 64.5, 64.4, 64.2, 26.4, 18.9, 14.4.

**HRMS(ESI):**  $m/z$  Calcd. for  $\text{C}_{23}\text{H}_{24}\text{O}_6$   $[\text{M}+\text{H}]^+$ : 417.1697; Found: 417.1702.

**Cyclohexyl(2-cyclohexyl-4-ethyl-5-methylphenyl)methanone (2r)**

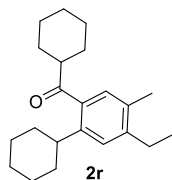

The title compound was prepared according to the general procedure as described, silica gel flash column chromatography was performed using hexanes and ethyl acetate (20:1) ( $R_f = 0.40$  in hexane:ethyl acetate = 15:1) resulting in 6 mg of yellow solid in 38% yield.

$^1\text{H NMR}$  (600 MHz,  $\text{Chloroform-}d$ )  $\delta$  7.12 (s, 1H), 7.08 (s, 1H), 2.94-2.89 (m, 1H), 2.70-2.66 (m, 1H), 2.62 (q,  $J = 7.2$  Hz, 2H), 2.28 (s, 3H), 1.88-1.85 (m, 3H), 1.81-1.79 (m, 7H), 1.46-1.30 (m, 10H), 1.21 (t,  $J = 7.8$  Hz, 3H).

$^{13}\text{C NMR}$  (151 MHz,  $\text{CDCl}_3$ )  $\delta$  210.4, 144.7, 144.2, 137.5, 132.8, 128.2, 126.7, 50.3, 40.5, 35.0, 29.0, 27.1, 26.6, 26.4, 26.1, 26.0, 18.9, 14.4.

**HRMS(ESI):**  $m/z$  Calcd. for  $\text{C}_{22}\text{H}_{32}\text{O}$   $[\text{M}+\text{H}]^+$ : 313.2526; Found: 313.2529.

**Cyclopropyl(2-cyclopropyl-4-ethyl-5-methylphenyl)methanone (2s)**

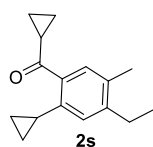

The title compound was prepared according to the general procedure as described, silica gel flash column chromatography was performed using hexanes and ethyl acetate (30:1) ( $R_f = 0.30$  in hexane:ethyl acetate = 15:1) resulting in 4 mg of yellow oil in 34% yield.

$^1\text{H NMR}$  (600 MHz,  $\text{CDCl}_3$ )  $\delta$  7.33 (s, 1H), 6.78 (s, 1H), 2.60 (q,  $J = 7.8$  Hz, 2H), 2.53-2.49 (m, 1H), 2.31-2.29 (m, 4H), 1.18 (t,  $J = 7.8$  Hz, 3H), 1.03-1.01 (m, 2H), 0.96-0.93 (m, 2H), 0.91-0.87 (m, 2H), 0.71-0.64 (m, 2H).

$^{13}\text{C NMR}$  (151 MHz,  $\text{CDCl}_3$ )  $\delta$  206.0, 145.5, 139.5, 139.3, 133.0, 129.6, 125.5, 26.5, 21.6, 18.7, 14.5, 13.4, 12.2, 8.9.

**HRMS(ESI):**  $m/z$  Calcd. for  $\text{C}_{16}\text{H}_{20}\text{O}$   $[\text{M}+\text{Na}]^+$ : 251.1406; Found: 251.1413.

#### (4-Ethyl-5-propyl-[1,1'-biphenyl]-2-yl)(phenyl)methanone (2t)

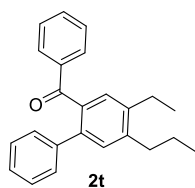

The title compound was prepared according to the general procedure as described, silica gel flash column chromatography was performed using hexanes and ethyl acetate (20:1) ( $R_f = 0.40$  in hexane:ethyl acetate = 15:1) resulting in 9.7 mg of yellow oil in 59% yield.

$^1\text{H NMR}$  (600 MHz,  $\text{CDCl}_3$ )  $\delta$  7.65 (d,  $J = 7.8$  Hz, 2H), 7.38 (t,  $J = 7.2$  Hz, 1H), 7.32 (s, 1H), 7.26-7.24 (m, 5H), 7.17 (t,  $J = 7.8$  Hz, 2H), 7.12 (d,  $J = 7.2$  Hz, 1H), 2.84-2.65 (m, 4H), 1.70 (q,  $J = 7.8$  Hz, 2H), 1.36-1.27 (m, 3H), 1.04 (t,  $J = 7.4$  Hz, 3H).

$^{13}\text{C NMR}$  (151 MHz,  $\text{CDCl}_3$ )  $\delta$  199.2, 143.1, 141.1, 140.6, 138.9, 137.9, 136.7, 132.7, 131.0, 130.1, 129.2, 129.1, 128.3, 128.1, 127.1, 34.9, 25.3, 24.3, 15.3, 14.4.

**HRMS(ESI):**  $m/z$  Calcd. for  $\text{C}_{24}\text{H}_{24}\text{O}$   $[\text{M}+\text{Na}]^+$ : 351.1719; Found: 351.1722.

#### (4-Benzyl-5-phenethyl-[1,1'-biphenyl]-2-yl)(phenyl)methanone (2u)

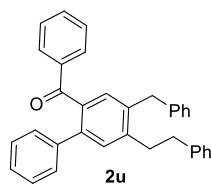

The title compound was prepared according to the general procedure as described, silica gel flash column chromatography was performed using hexanes and ethyl acetate (30:1) ( $R_f = 0.40$  in hexane:ethyl acetate = 15:1) resulting in 11 mg of yellow oil in 49% yield.

$^1\text{H}$  NMR (600 MHz,  $\text{CDCl}_3$ )  $\delta$  7.64 (d,  $J = 7.2$  Hz, 2H), 7.39 (t,  $J = 7.2$  Hz, 2H), 7.32-7.27 (m, 7H), 7.25-7.15 (m, 11H), 7.15-7.13 (m, 2H), 7.13-7.08 (m, 2H), 4.07 (s, 2H), 2.98 (t,  $J = 7.2$  Hz, 2H), 2.80 (m, 2H).

$^{13}\text{C}$  NMR (151 MHz,  $\text{CDCl}_3$ )  $\delta$  202.3, 145.3, 142.1, 140.2, 139.9, 137.5, 137.3, 136.5, 133.6, 133.0, 131.78, 131.4, 130.0, 129.5, 129.1, 129.0, 128.7, 128.6, 128.4, 128.2, 127.5, 125.8, 125.5, 125.3, 54.6, 51.8, 40.8, 38.6, 36.9.

**HRMS(ESI):**  $m/z$  Calcd. for  $\text{C}_{34}\text{H}_{28}\text{O}$   $[\text{M}+\text{Na}]^+$ : 475.2032; Found: 475.2028

### Phenyl(4-(4-(trifluoromethyl)benzyl)-5-(4-(trifluoromethyl)phenethyl)-[1,1'-biphenyl]-2-yl)methanone (2v)

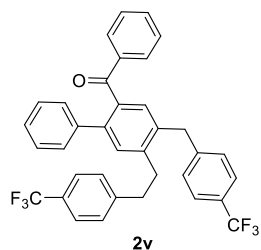

The title compound was prepared according to the general procedure as described, silica gel flash column chromatography was performed using hexanes and ethyl acetate (15:1) ( $R_f = 0.40$  in hexane:ethyl acetate = 8:1) resulting in 8.8 mg of yellow oil in 30% yield.

$^1\text{H}$  NMR (400 MHz,  $\text{CDCl}_3$ )  $\delta$  7.97 (d,  $J = 7.7$  Hz, 1H), 7.78 (d,  $J = 7.5$  Hz, 1H), 7.63-7.28 (m, 12H), 7.25-7.15 (m, 5H), 6.92 (d,  $J = 7.9$  Hz, 1H), 4.10 (s, 2H), 2.99-2.85 (m, 4H).

$^{13}\text{C}$  NMR (101 MHz,  $\text{CDCl}_3$ )  $\delta$  202.3, 145.3, 142.1, 140.3, 139.9, 137.6, 137.4, 136.6, 133.6, 133.1, 131.8, 131.5, 130.1, 129.5, 129.2, 129.0, 128.7, 128.7, 128.5, 128.3, 127.6, 125.8, 125.6, 125.4, 54.6, 51.9, 40.8, 38.7, 36.9.

$^{19}\text{F}$  NMR (376 MHz,  $\text{CDCl}_3$ )  $\delta$  -62.38, -62.41.

**HRMS(ESI):**  $m/z$  Calcd. for  $\text{C}_{36}\text{H}_{26}\text{F}_6\text{O}$   $[\text{M}+\text{Na}]^+$ : 611.1780; Found: 611.1783.

### (4-Ethyl-3-methylphenyl)(pyridin-2-yl)methanone (2w)

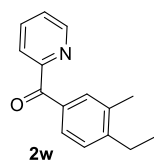

The title compound was prepared according to the general procedure as described, silica gel flash column chromatography was performed using hexanes and ethyl acetate (40:1) ( $R_f = 0.30$  in hexane:ethyl acetate = 15:1) resulting in 6.8 mg of yellow oil in 60% yield.

$^1\text{H}$  NMR (600 MHz, DMSO- $d_6$ )  $\delta$  8.63 (d,  $J = 4.2$  Hz, 1H), 7.95-7.87 (m, 2H), 7.85-7.83 (m, 1H), 7.78 (d,  $J = 2.0$  Hz, 1H), 7.32-7.29 (m, 1H), 7.24 (d,  $J = 7.8$  Hz, 1H), 2.67 (q,  $J = 7.8$  Hz, 2H), 2.31 (s, 3H), 1.21 (t,  $J = 7.6$  Hz, 3H).

$^{13}\text{C}$  NMR (151 MHz, DMSO- $d_6$ )  $\delta$  156.7, 149.9, 142.7, 137.6, 137.0, 136.9, 130.8, 126.5, 124.3, 122.7, 120.4, 26.2, 19.1, 14.9.

**HRMS(ESI):**  $m/z$  Calcd. for  $\text{C}_{15}\text{H}_{15}\text{NO}$   $[\text{M}+\text{H}]^+$ : 226.1226; Found: 226.1226.

## IV NMR spectra

<sup>1</sup>H NMR (400 MHz, CDCl<sub>3</sub>) for **2a**

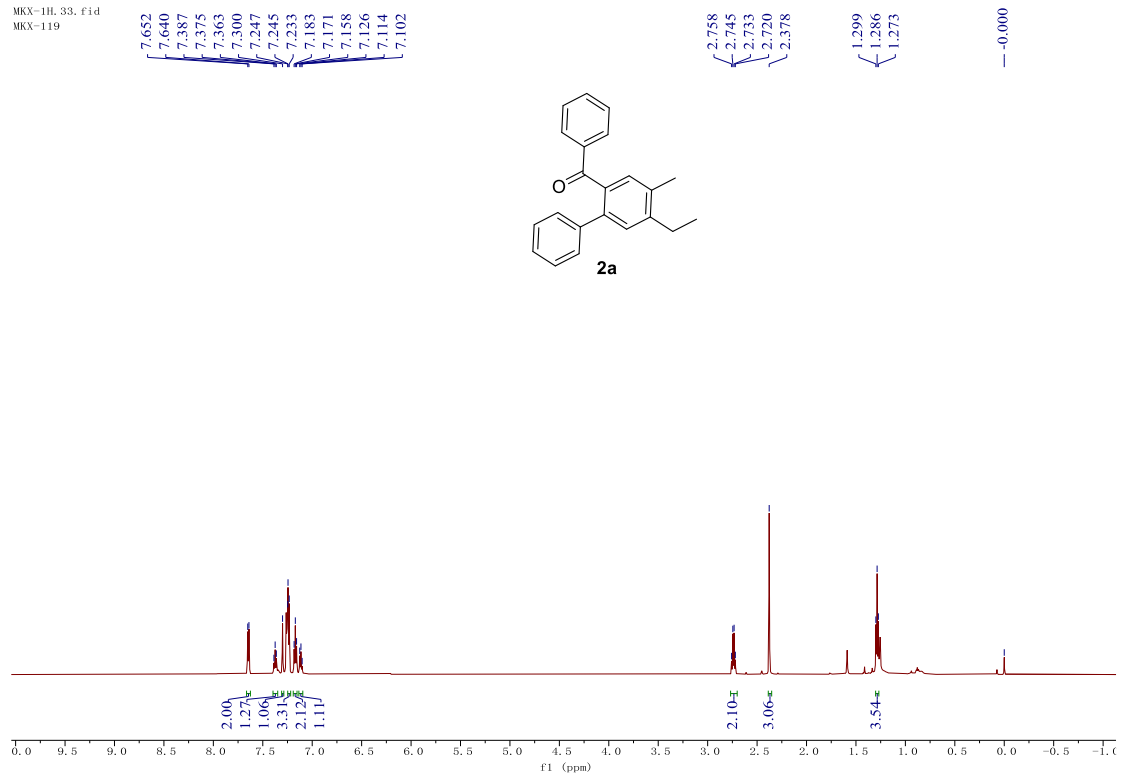

<sup>13</sup>C NMR (101 MHz, CDCl<sub>3</sub>) for **2a**

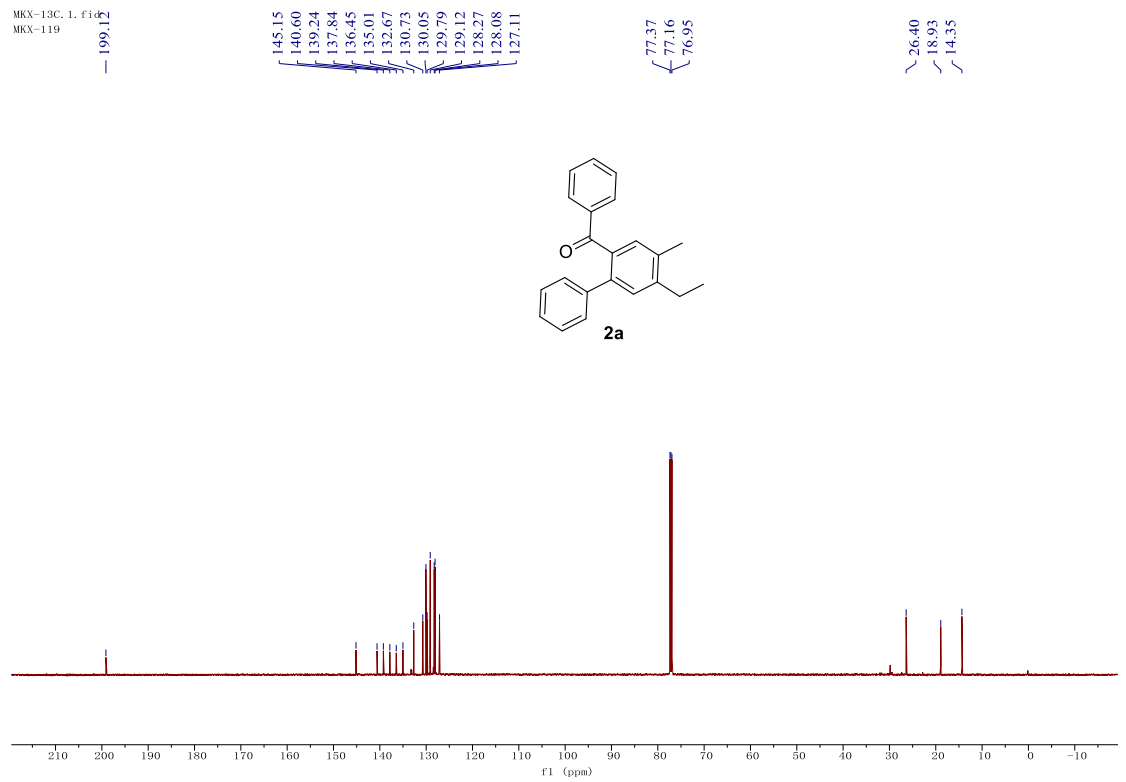



### <sup>1</sup>H NMR (400 MHz, CDCl<sub>3</sub>) for **2b**

MRX-1H, 61, f1d  
MRX-145c

7.735  
7.722  
7.542  
7.528  
7.453  
7.439  
7.348  
7.320  
7.307  
7.261

2.781  
2.768  
2.755  
2.743  
2.405

1.313  
1.301  
1.288

-0.000

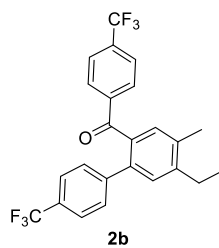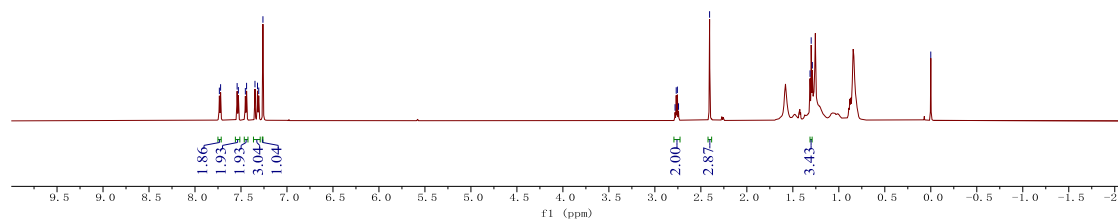

### <sup>13</sup>C NMR (101 MHz, CDCl<sub>3</sub>) for **2b**

MRX-13C, 4, f1d  
MRX-145c

197.37

146.30  
144.07  
140.67  
138.27  
136.19  
135.57  
131.21  
130.19  
129.99  
129.60  
129.46  
125.36  
125.33  
125.31  
125.29

77.37  
77.46  
76.95

26.44  
19.01  
14.25

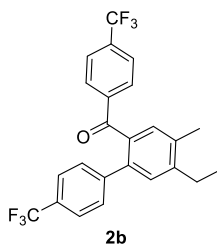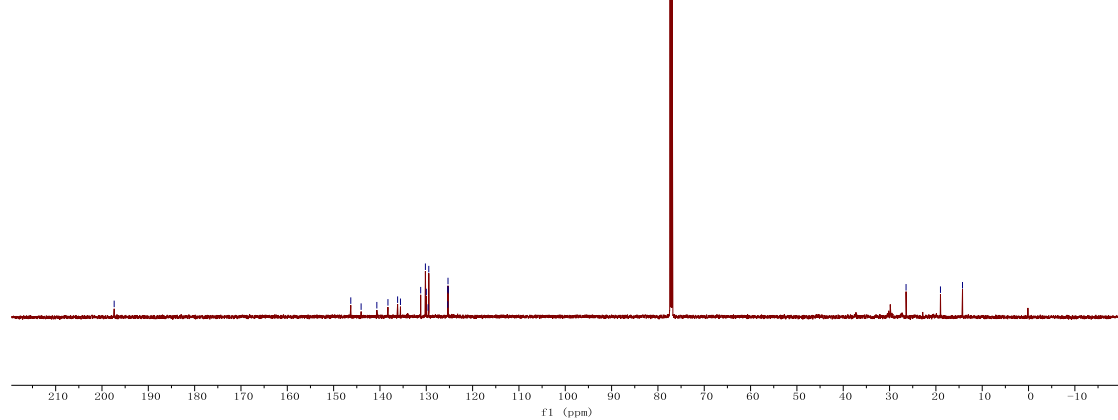

<sup>19</sup>F NMR (376 MHz, CDCl<sub>3</sub>) for **2b**

MX-19F, 3, f1d  
MX-145C

-62.735  
-63.271

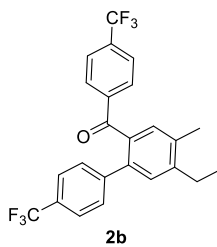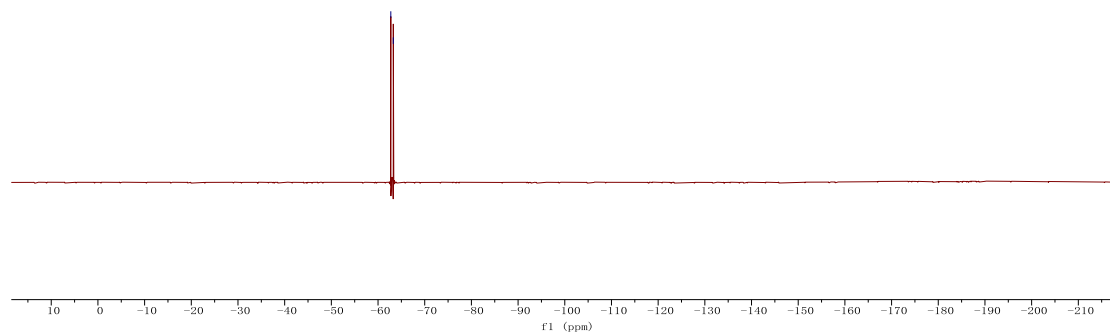

<sup>1</sup>H NMR (400 MHz, CDCl<sub>3</sub>) for **2c**

250H, 1, f1d

7.664  
7.647  
7.453  
7.435  
7.420  
7.416  
7.412  
7.310  
7.291  
7.284  
7.272  
7.261  
7.228  
7.212  
7.186  
7.177  
7.162  
7.139

2.764  
2.745  
2.726  
2.707  
2.374

1.284  
1.264  
1.254

-0.000

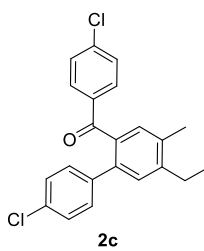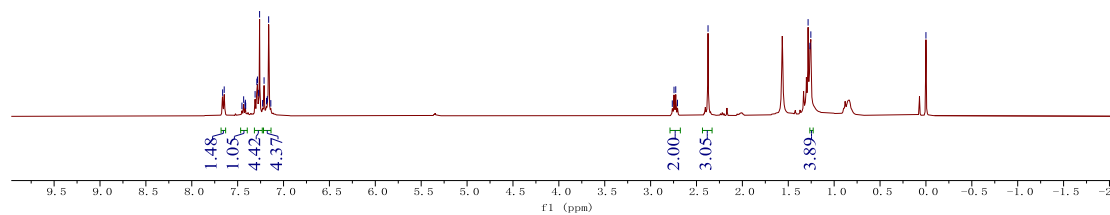

<sup>13</sup>C NMR (151 MHz, CDCl<sub>3</sub>) for **2c**

250H. 2. fid

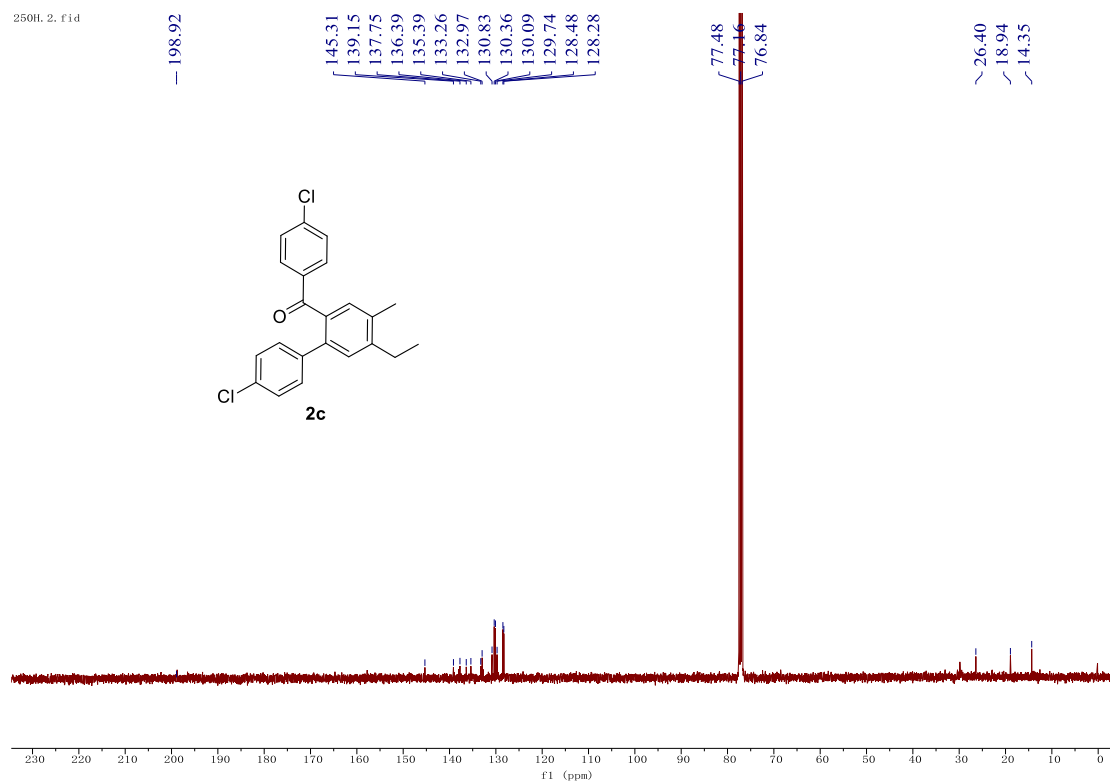

<sup>1</sup>H NMR (400 MHz, CDCl<sub>3</sub>) for **2d**

MRX-1H. 70. fid  
MRX-151b

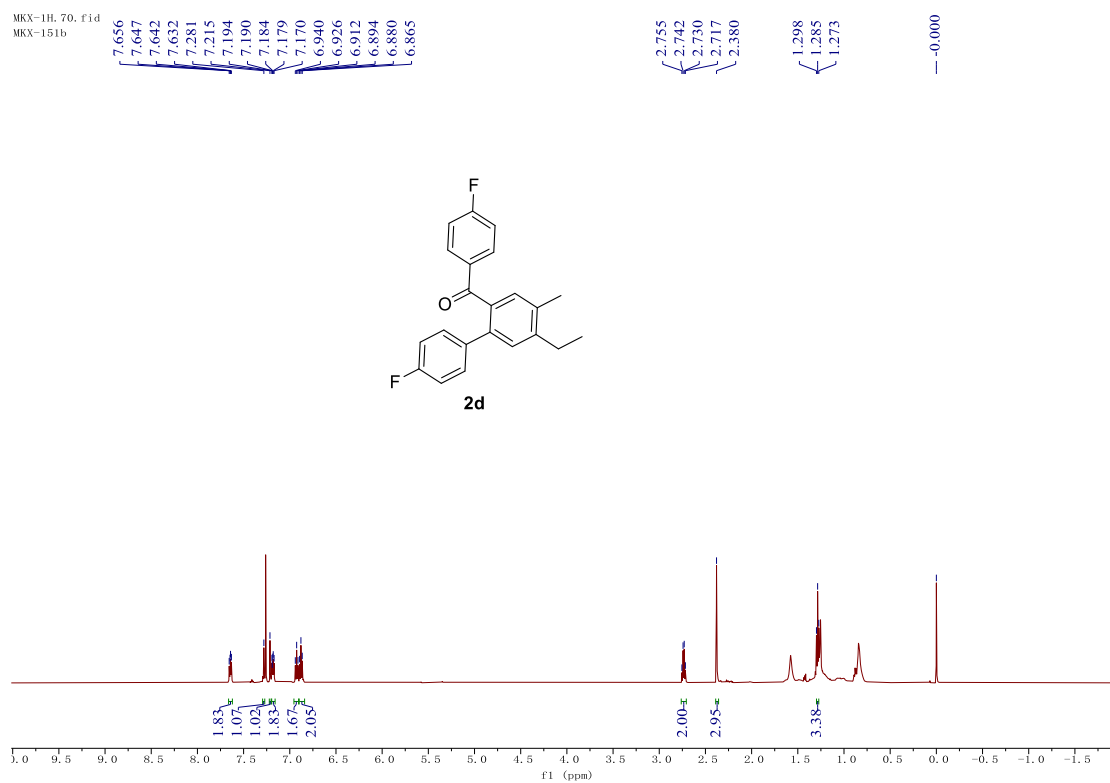

<sup>13</sup>C NMR (151 MHz, CDCl<sub>3</sub>) for **2d**

MXX-13C, 5, f1.d  
MXX-151B

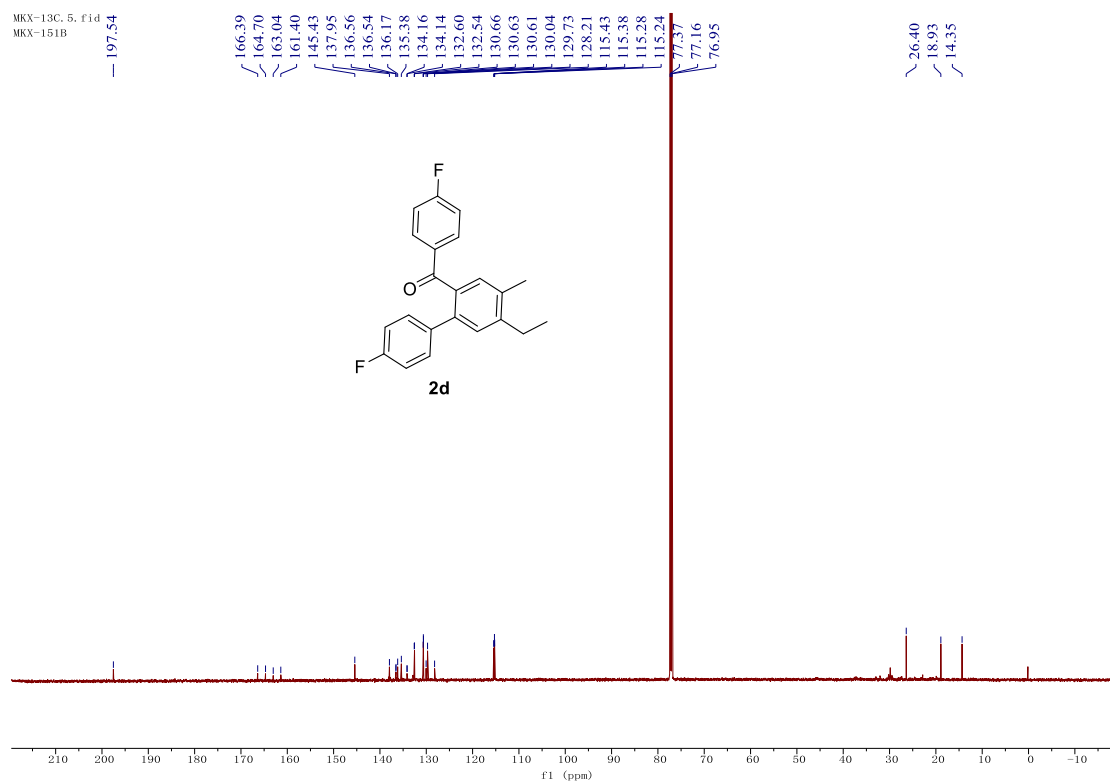

<sup>19</sup>F NMR (376 MHz, CDCl<sub>3</sub>) for **2d**

MXX-19F, 4, f1.d  
MXX-151B-1

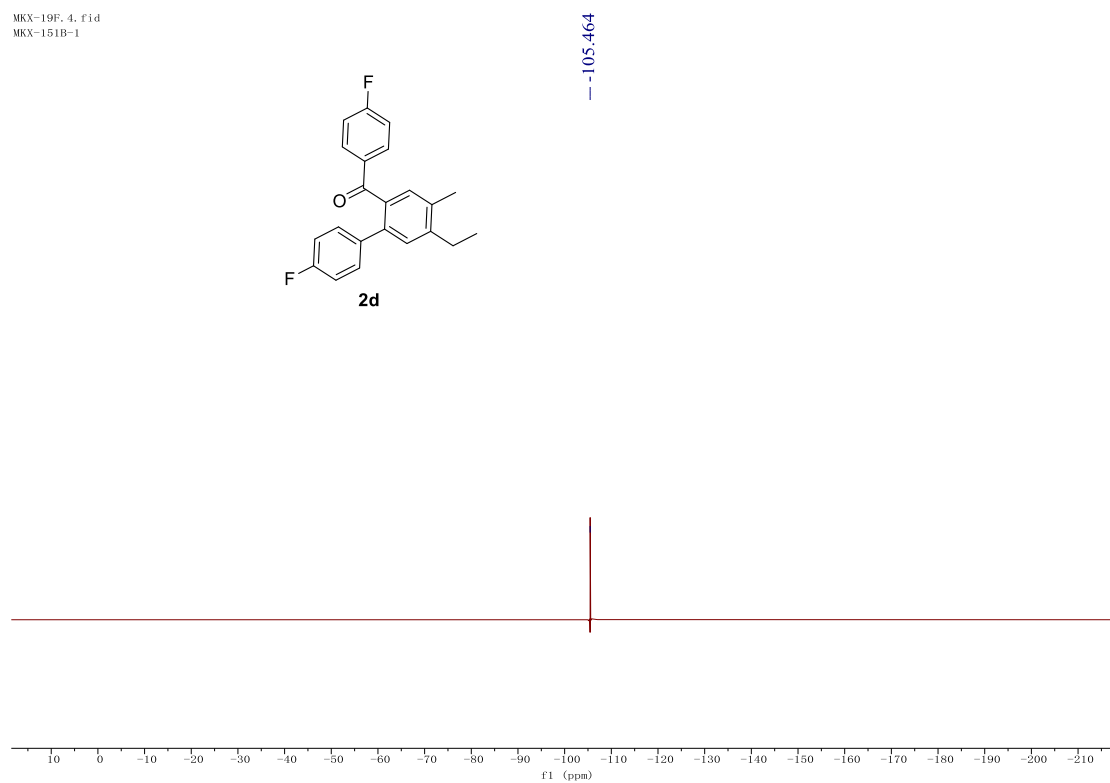

<sup>1</sup>H NMR (400 MHz, CDCl<sub>3</sub>) for **2e**

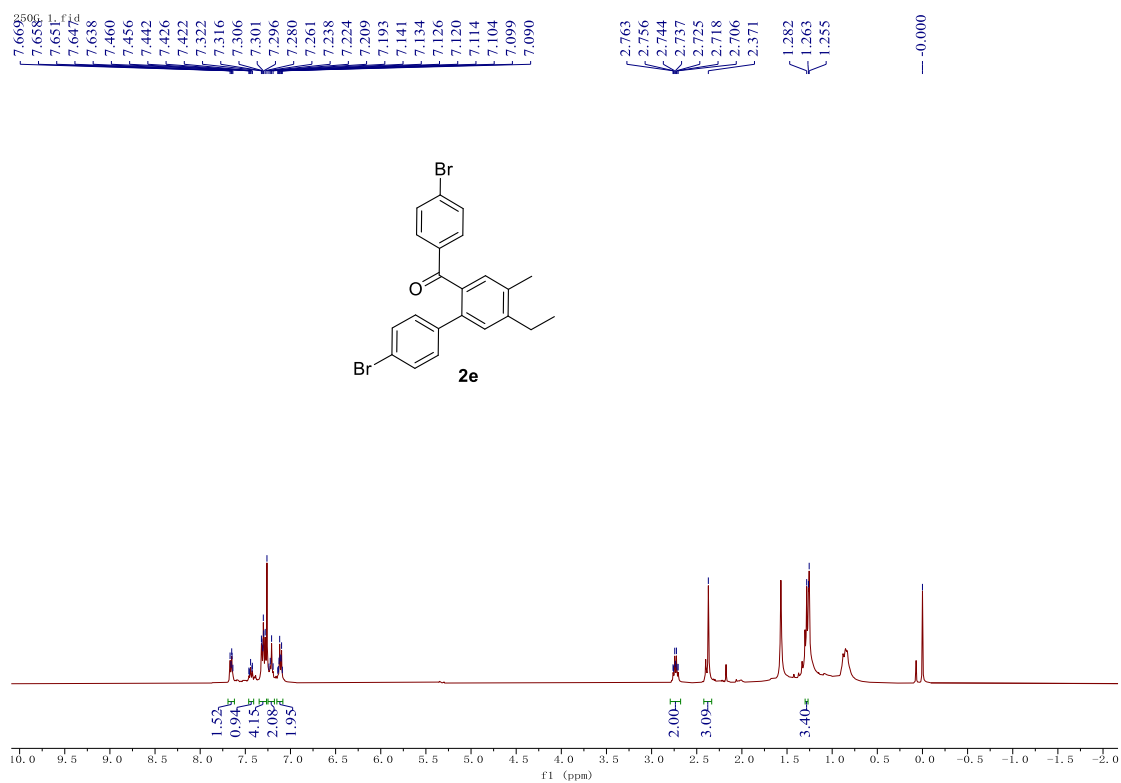

<sup>13</sup>C NMR (101 MHz, CDCl<sub>3</sub>) for **2e**

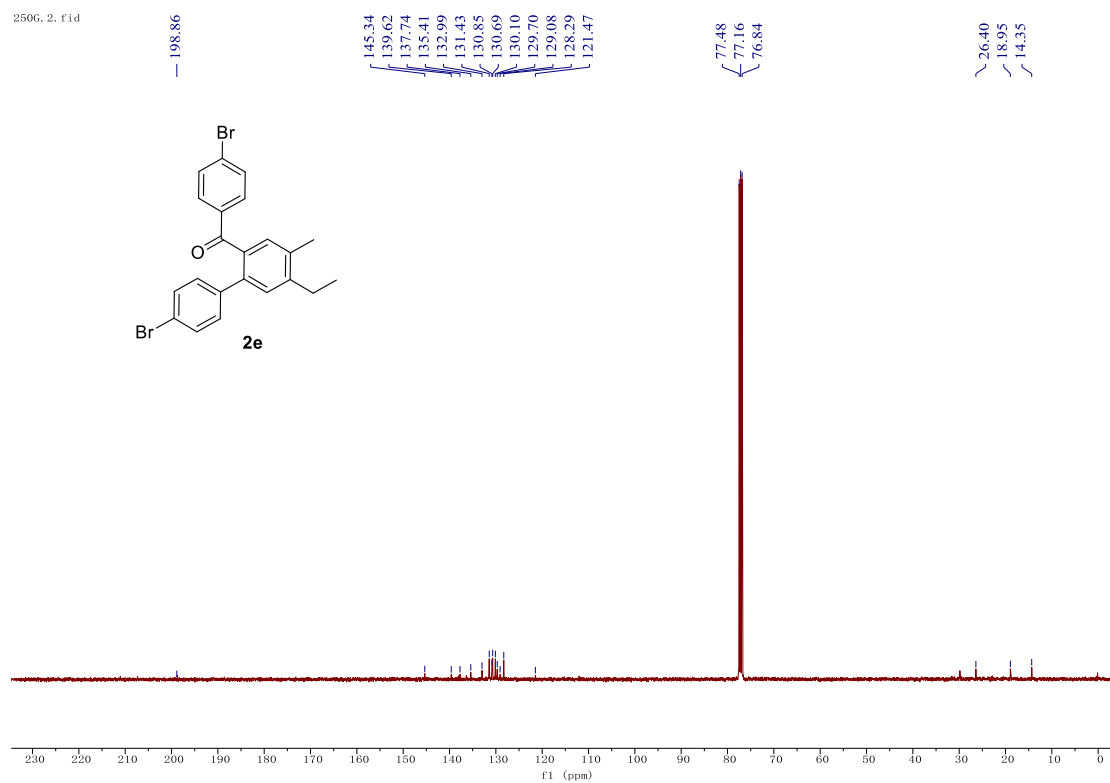

<sup>1</sup>H NMR (400 MHz, CDCl<sub>3</sub>) for **2f**

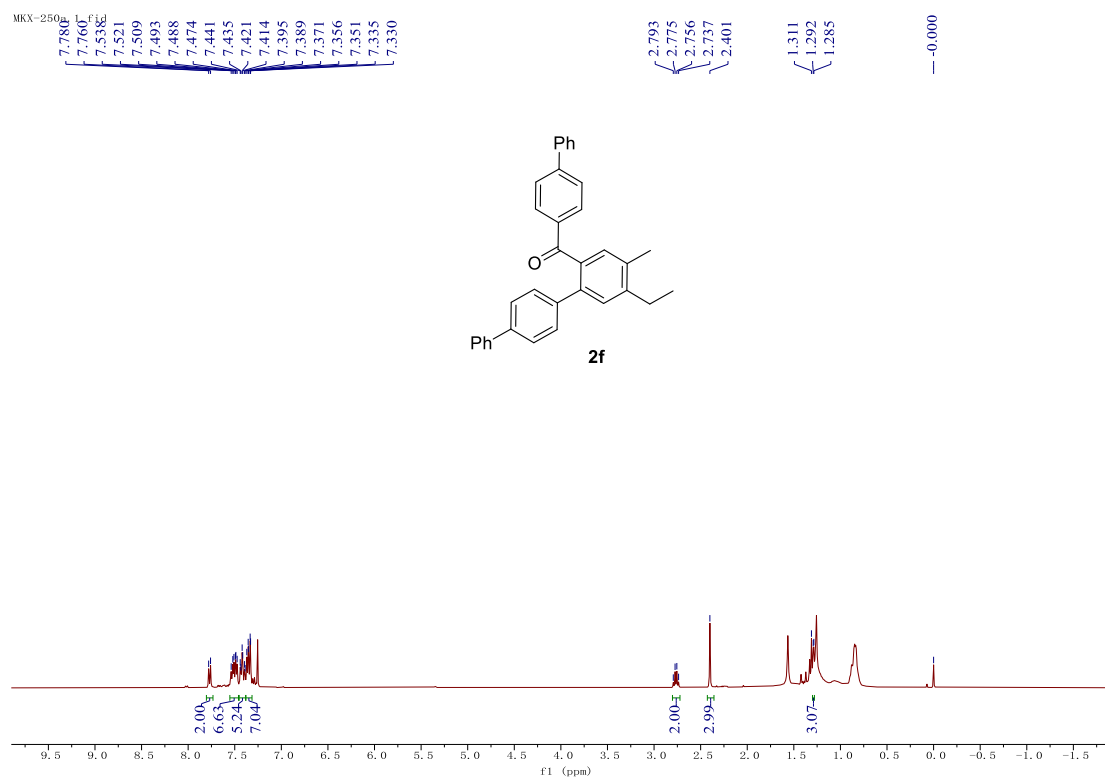

<sup>13</sup>C NMR (101 MHz, CDCl<sub>3</sub>) for **2f**

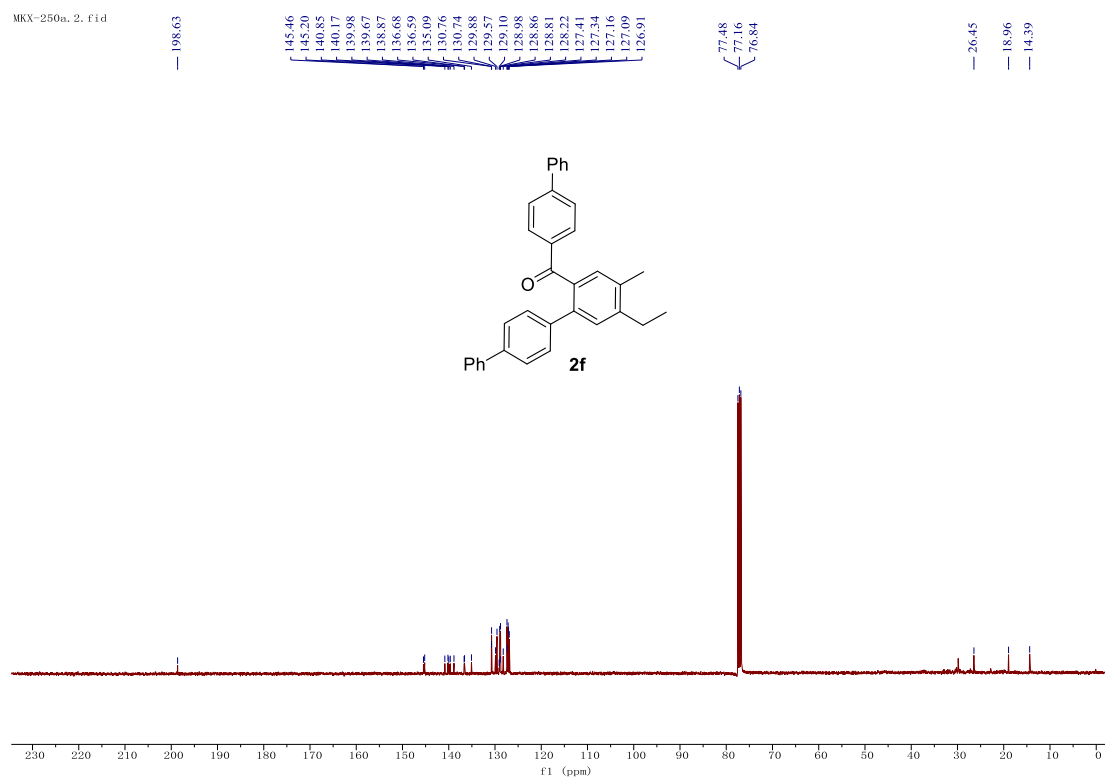

<sup>1</sup>H NMR (400 MHz, CDCl<sub>3</sub>) for **2g**

MRX-1H. 5. fid  
MRX-231a

7.630  
7.616  
7.335  
7.229  
7.214  
7.200  
7.065  
7.051  
7.025  
7.012

2.766  
2.753  
2.740  
2.728  
2.396

1.291  
1.285  
1.278

-0.000

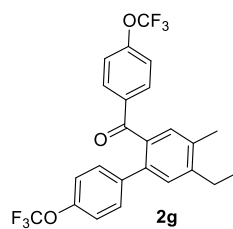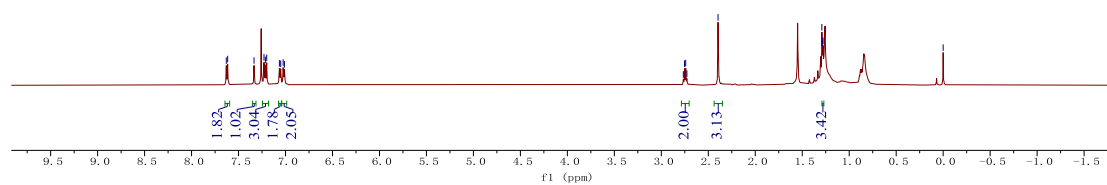

<sup>13</sup>C NMR (101 MHz, CDCl<sub>3</sub>) for **2g**

MRX-13C. 3. fid  
MRX-231a

152.34  
145.89  
139.22  
137.93  
136.21  
135.98  
135.85  
131.79  
130.92  
130.51  
129.73  
120.82  
119.99

77.37  
77.16  
76.95

26.42  
18.95  
14.29

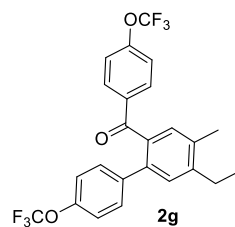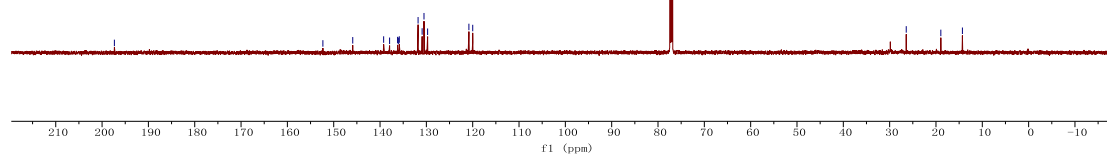

<sup>19</sup>F NMR (376 MHz, CDCl<sub>3</sub>) for **2g**

MX-19F\_1.fid  
MX-231a

-57.783  
-58.073

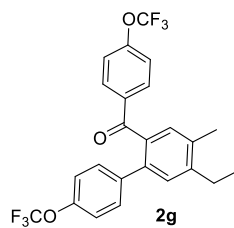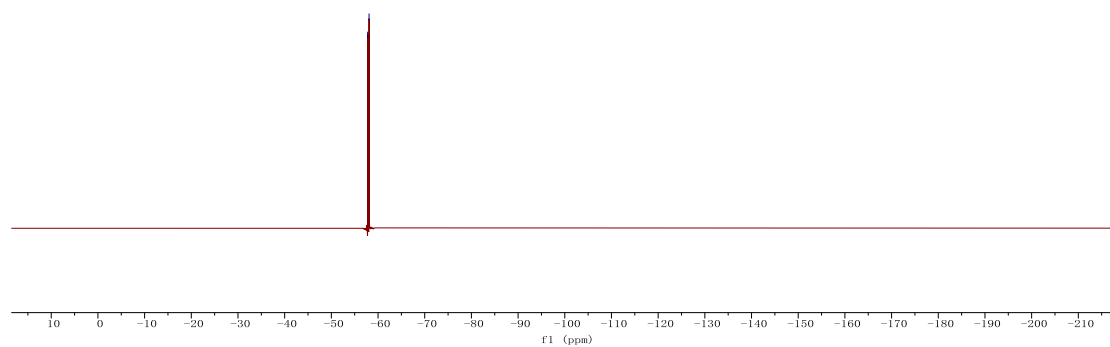

<sup>1</sup>H NMR (400 MHz, CDCl<sub>3</sub>) for **2h**

MX-1H\_44.fid  
MX-142c

7.668  
7.655  
7.220  
7.196  
7.182  
6.759  
6.743  
6.728

3.799  
3.727

2.739  
2.727  
2.714  
2.702  
2.355

1.287  
1.275  
1.261

0.000

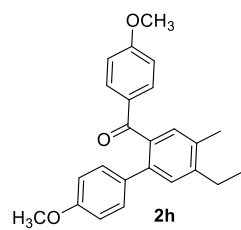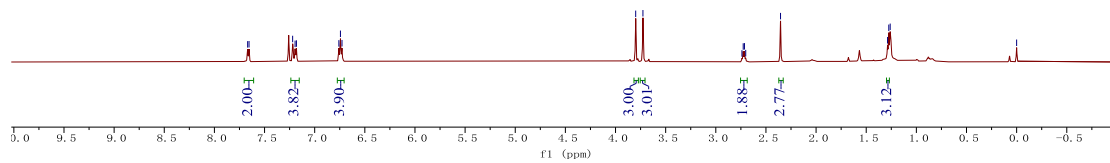



<sup>13</sup>C NMR (101 MHz, CDCl<sub>3</sub>) for 2h

MX-13C. 2. fid  
MX-142c

- 197.98
- 163.30
- 158.80
- 144.61
- 138.34
- 136.68
- 134.48
- 133.20
- 132.48
- 130.76
- 130.30
- 130.10
- 129.62
- 113.81
- 113.43
- 77.37
- 77.16
- 76.95
- 55.51
- 55.31
- 26.38
- 18.89
- 14.41

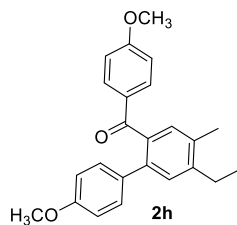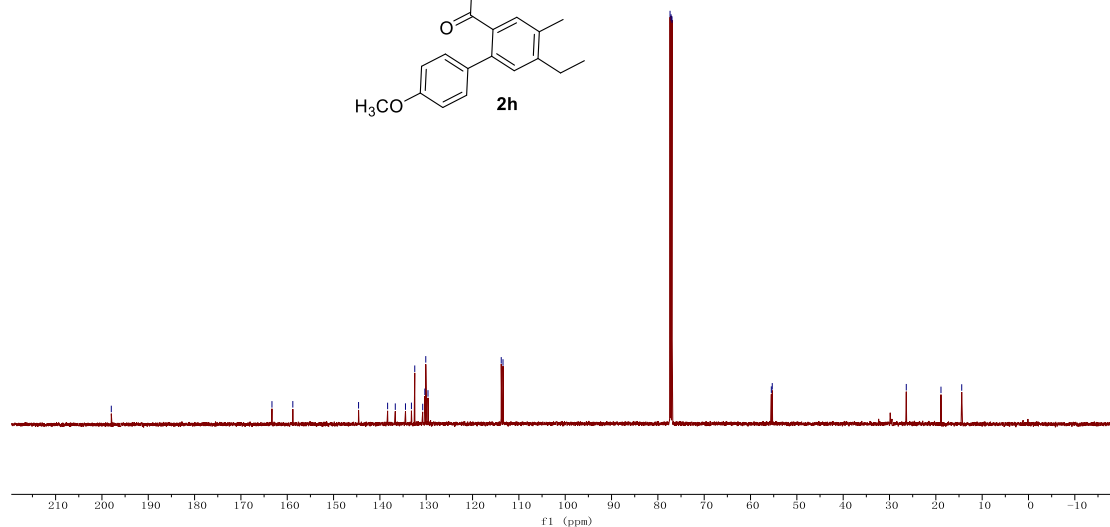

<sup>1</sup>H NMR (400 MHz, CDCl<sub>3</sub>) for 2i

MX-1H. 60. fid  
MX-145a

- 7.615
- 7.602
- 7.243
- 7.217
- 7.156
- 7.143
- 7.098
- 7.085
- 7.011
- 6.998
- 2.741
- 2.728
- 2.715
- 2.703
- 2.352
- 2.334
- 2.247
- 1.287
- 1.274
- 1.257
- 0.000

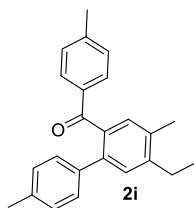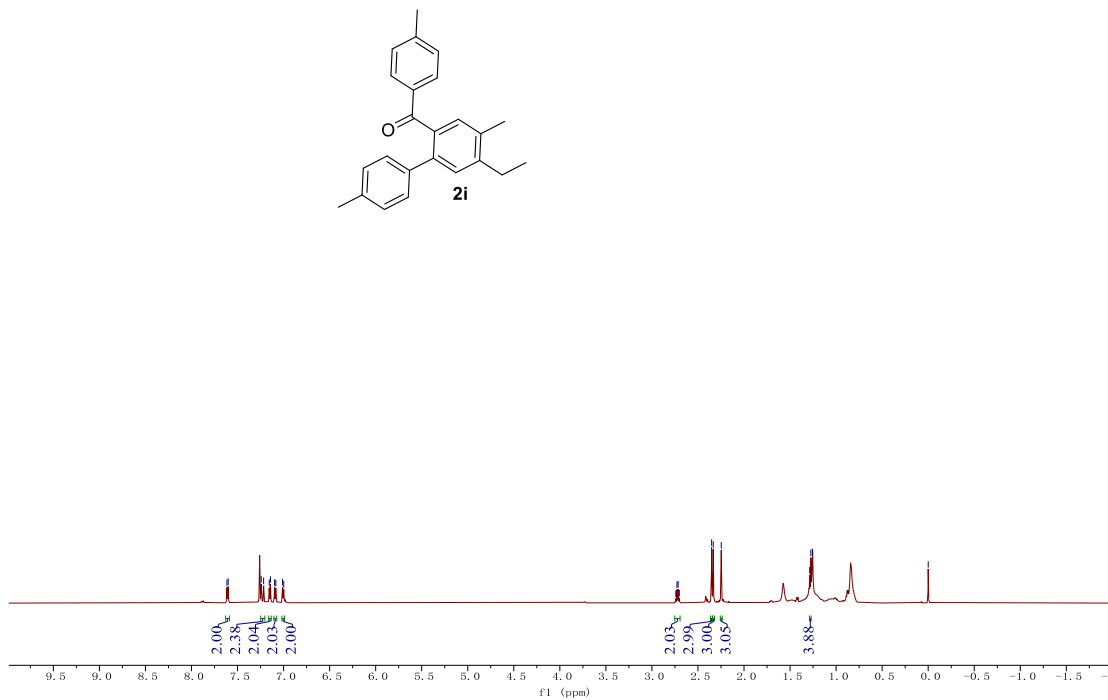

<sup>13</sup>C NMR (101 MHz, CDCl<sub>3</sub>) for **2i**

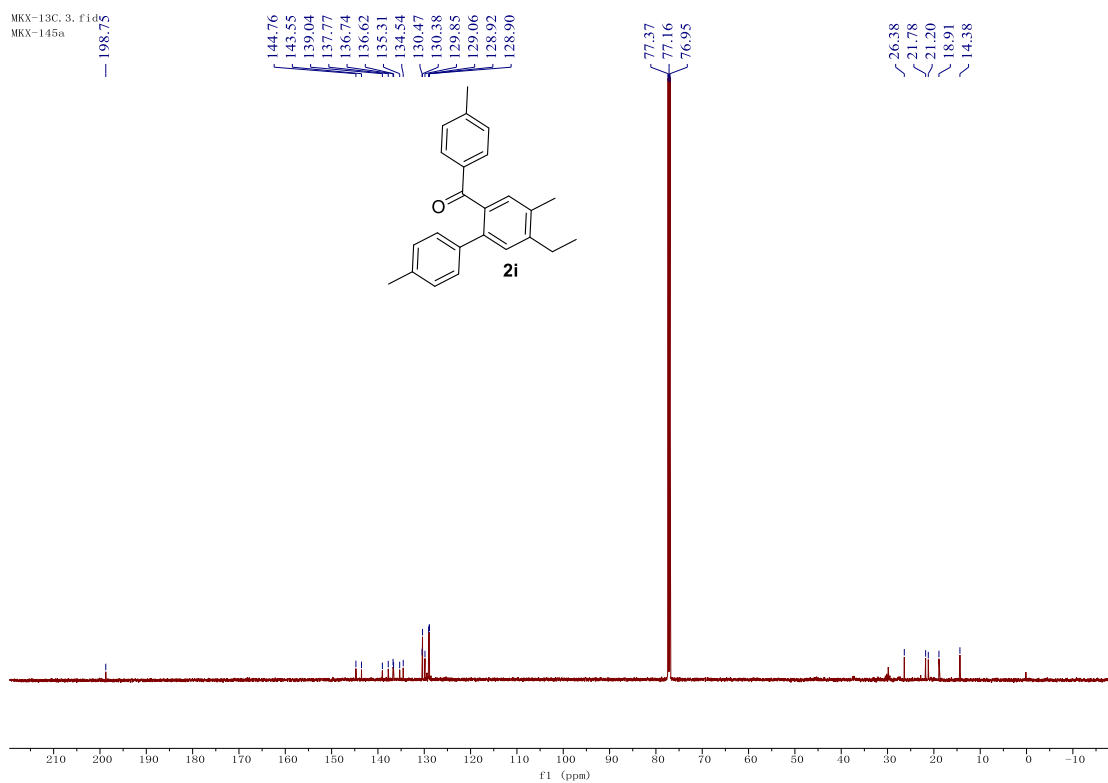

<sup>1</sup>H NMR (400 MHz, CDCl<sub>3</sub>) for **2j**

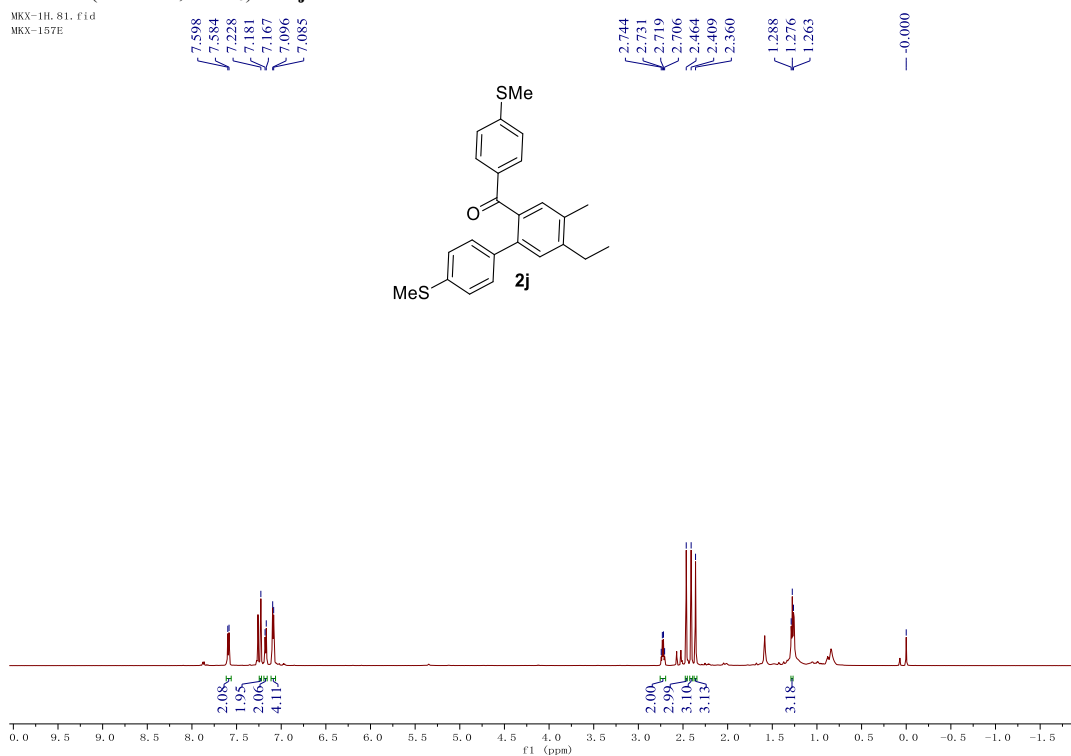

<sup>13</sup>C NMR (101 MHz, CDCl<sub>3</sub>) for **2j**

MX-13C. 9. f1d  
MX157e

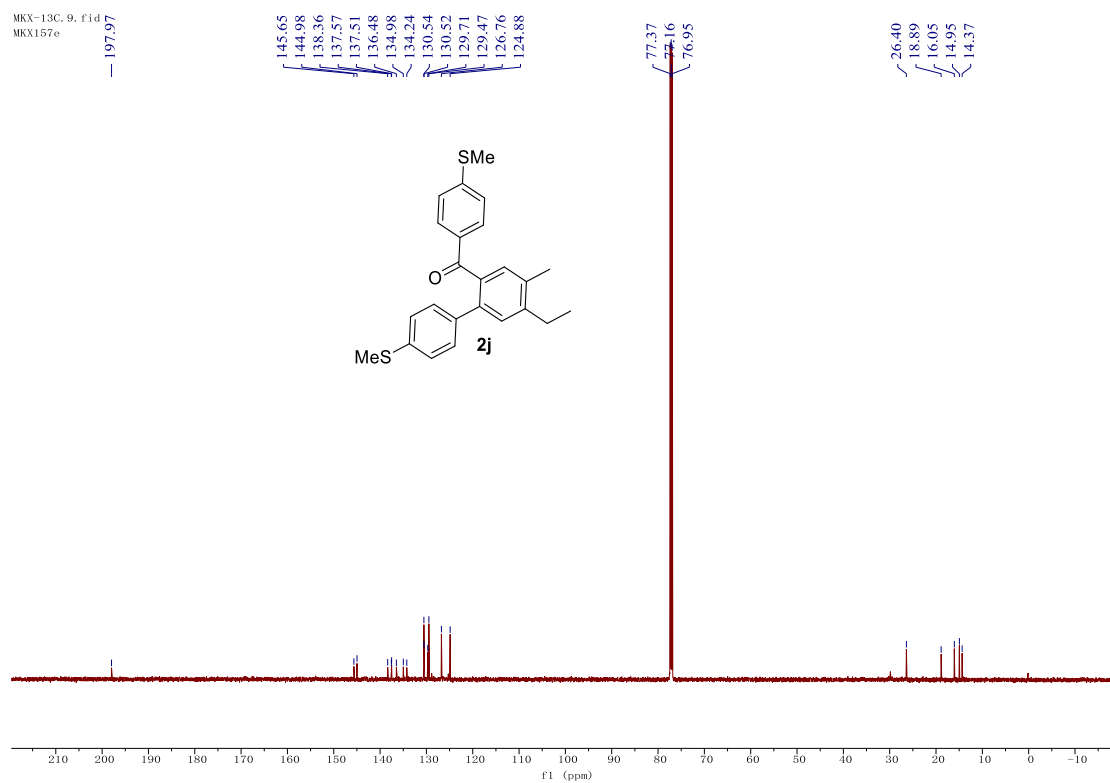

<sup>1</sup>H NMR (400 MHz, CDCl<sub>3</sub>) for **2k**

MX-250h. 1. f1d

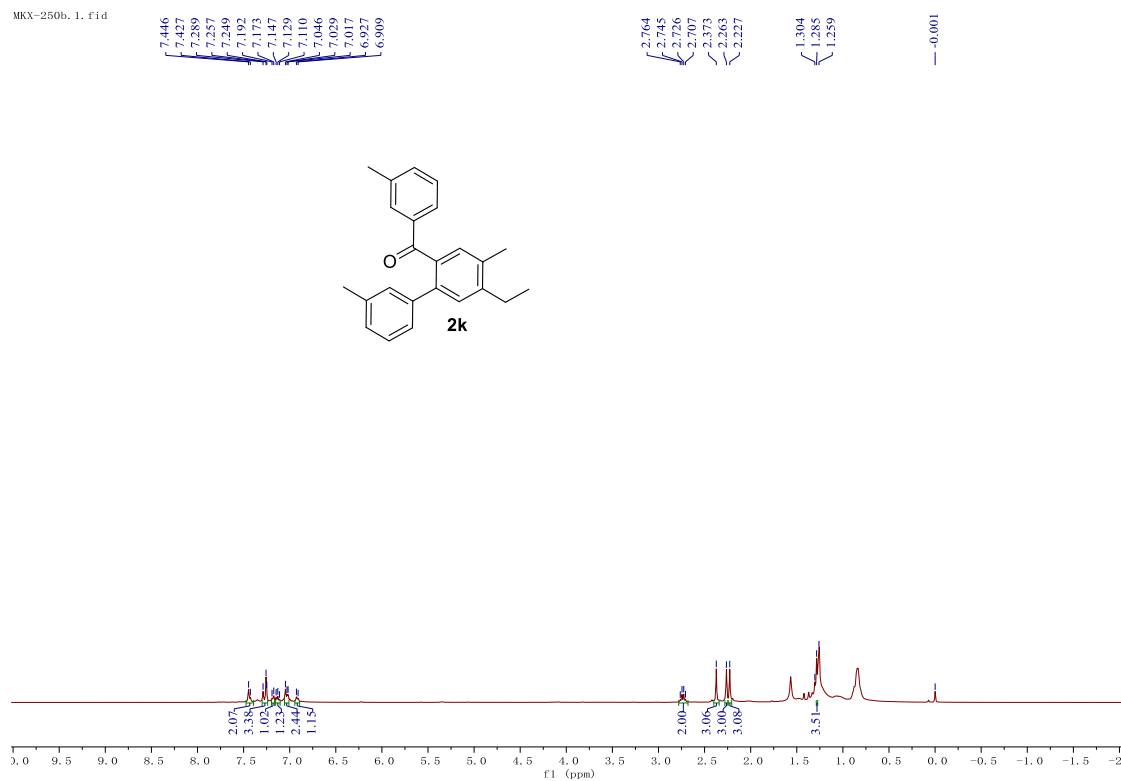



<sup>13</sup>C NMR (151 MHz, CDCl<sub>3</sub>) for **2l**

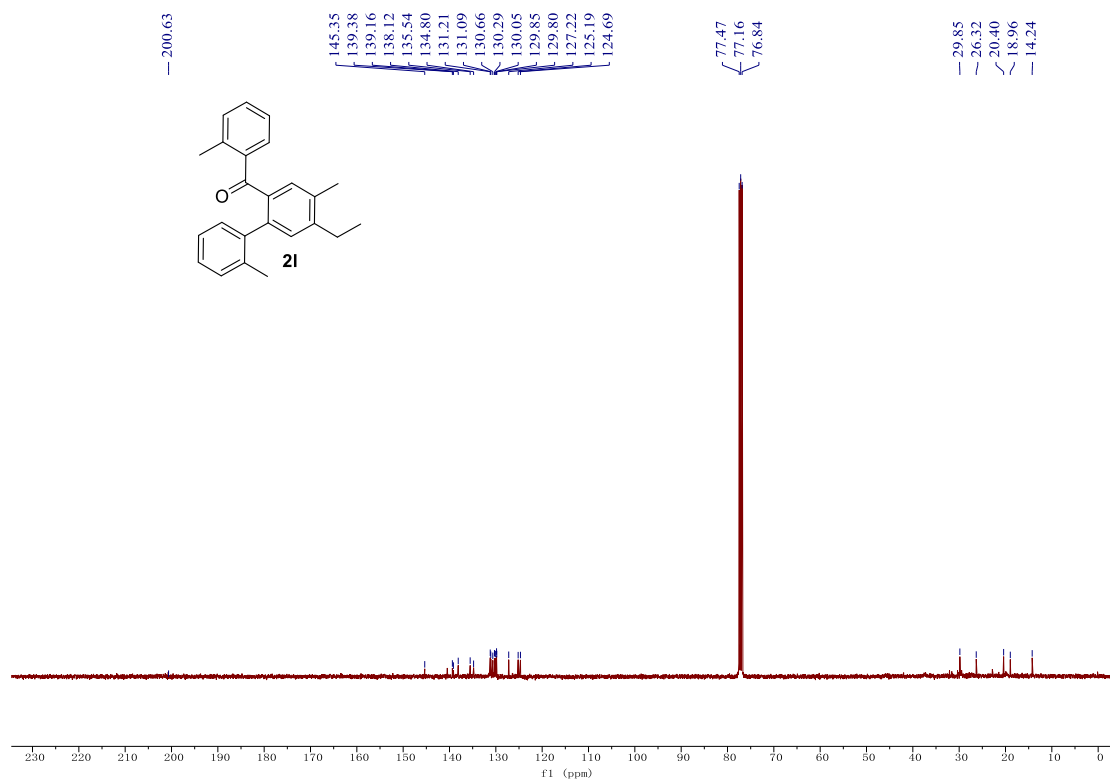

<sup>1</sup>H NMR (400 MHz, CDCl<sub>3</sub>) for **2m**

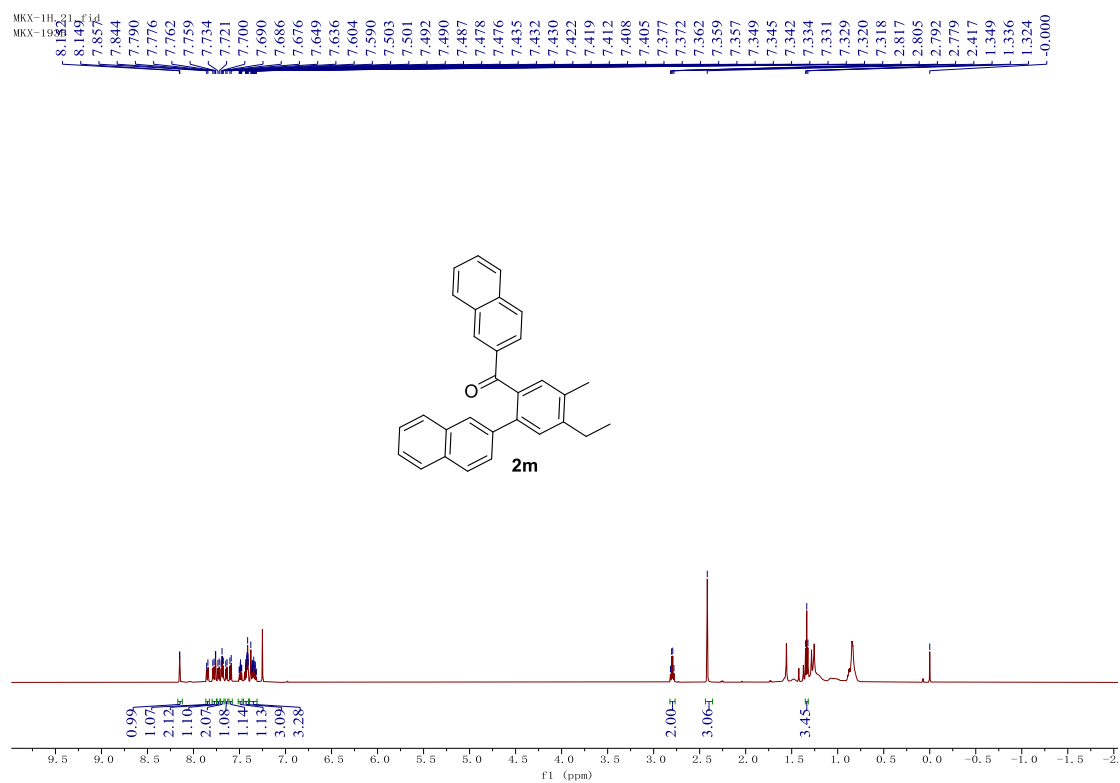

<sup>13</sup>C NMR (151 MHz, CDCl<sub>3</sub>) for **2m**

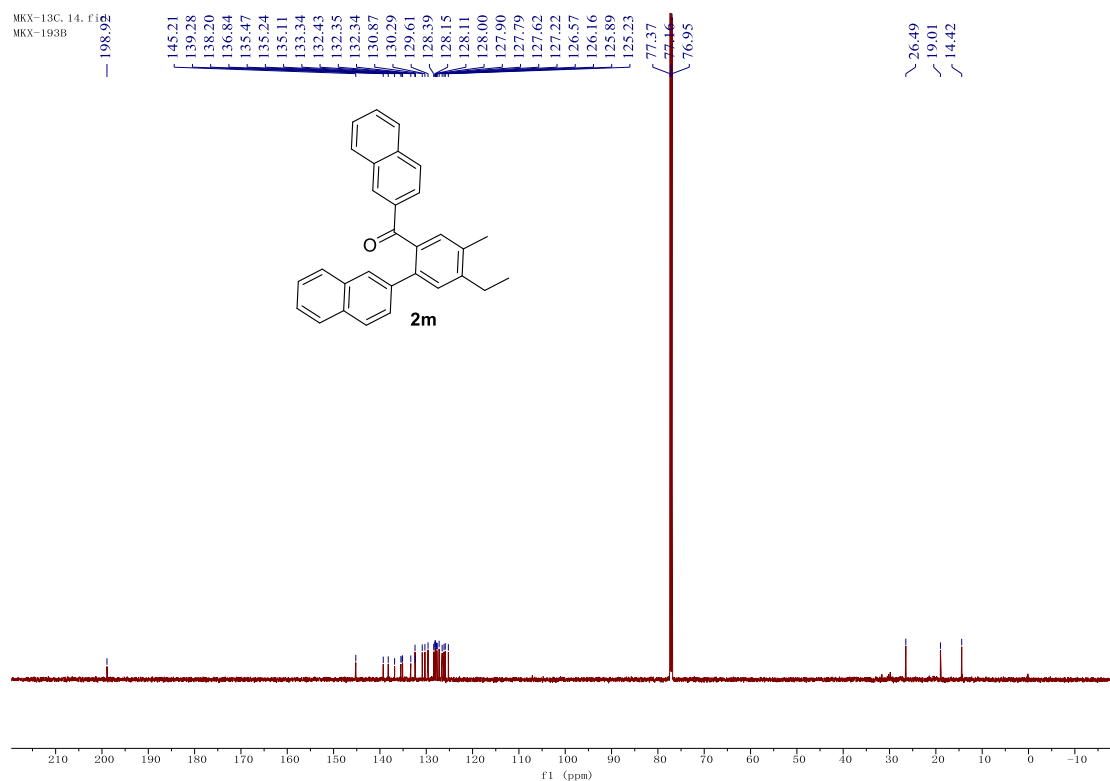

<sup>1</sup>H NMR (400 MHz, CDCl<sub>3</sub>) for **2n**

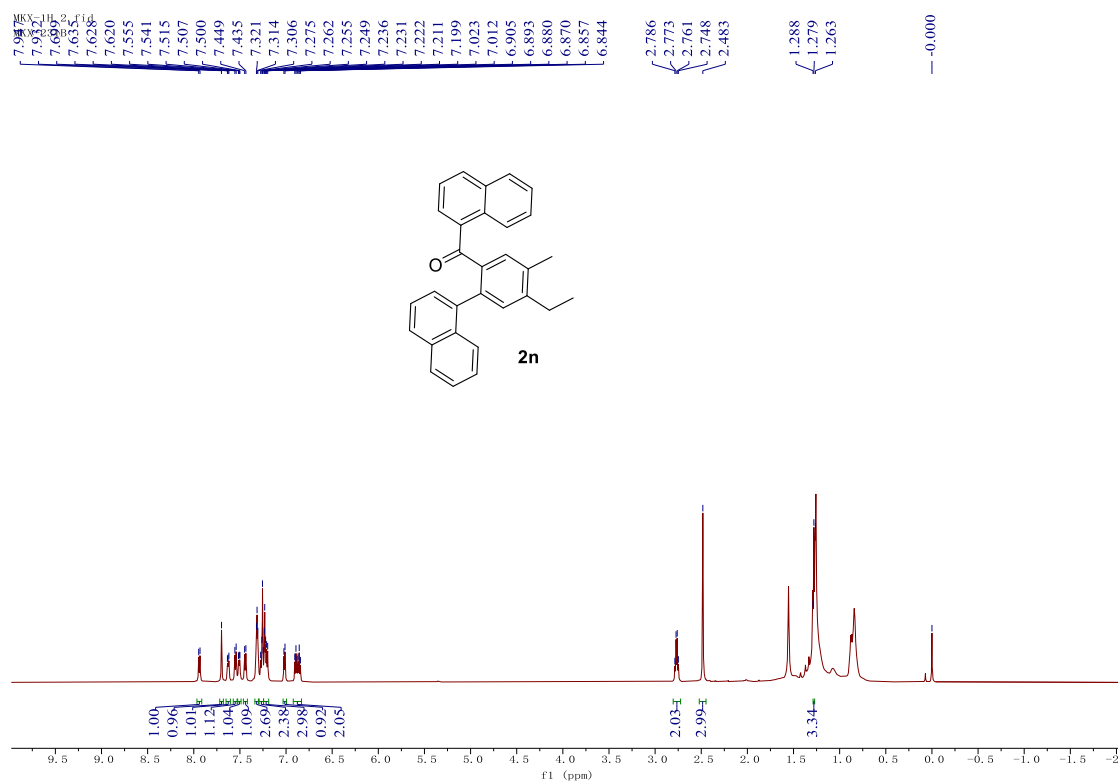

<sup>13</sup>C NMR (151 MHz, CDCl<sub>3</sub>) for **2n**

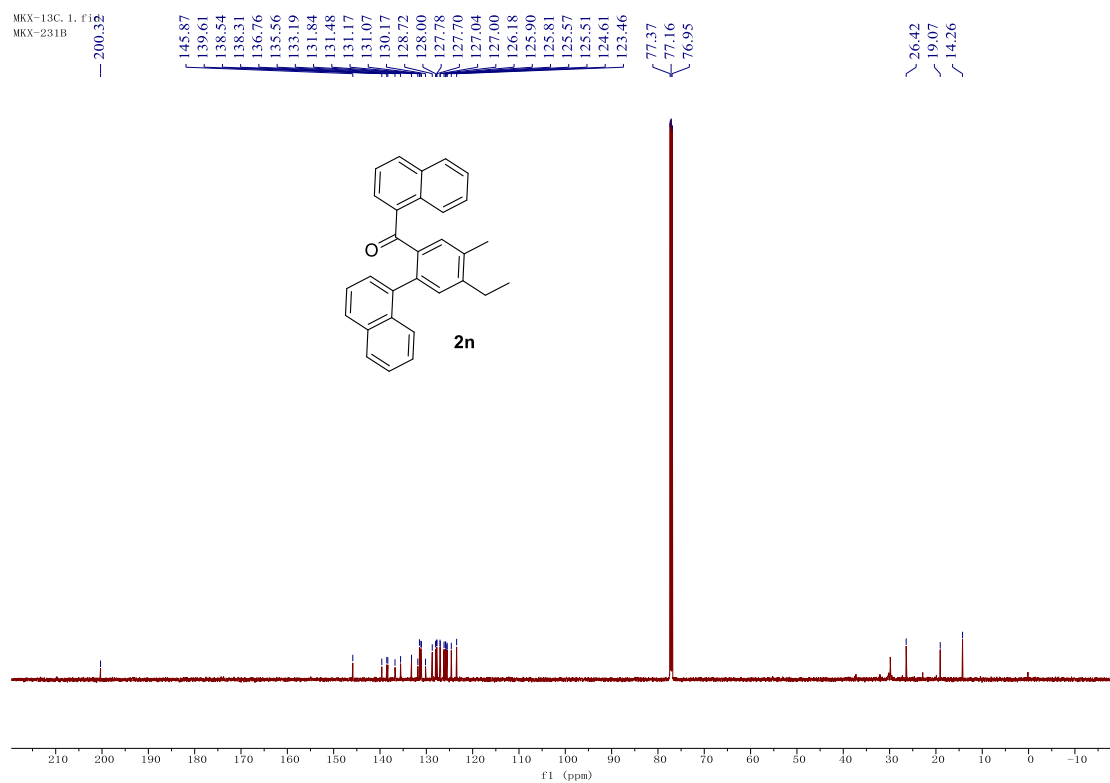

<sup>1</sup>H NMR (400 MHz, CDCl<sub>3</sub>) for **2o**

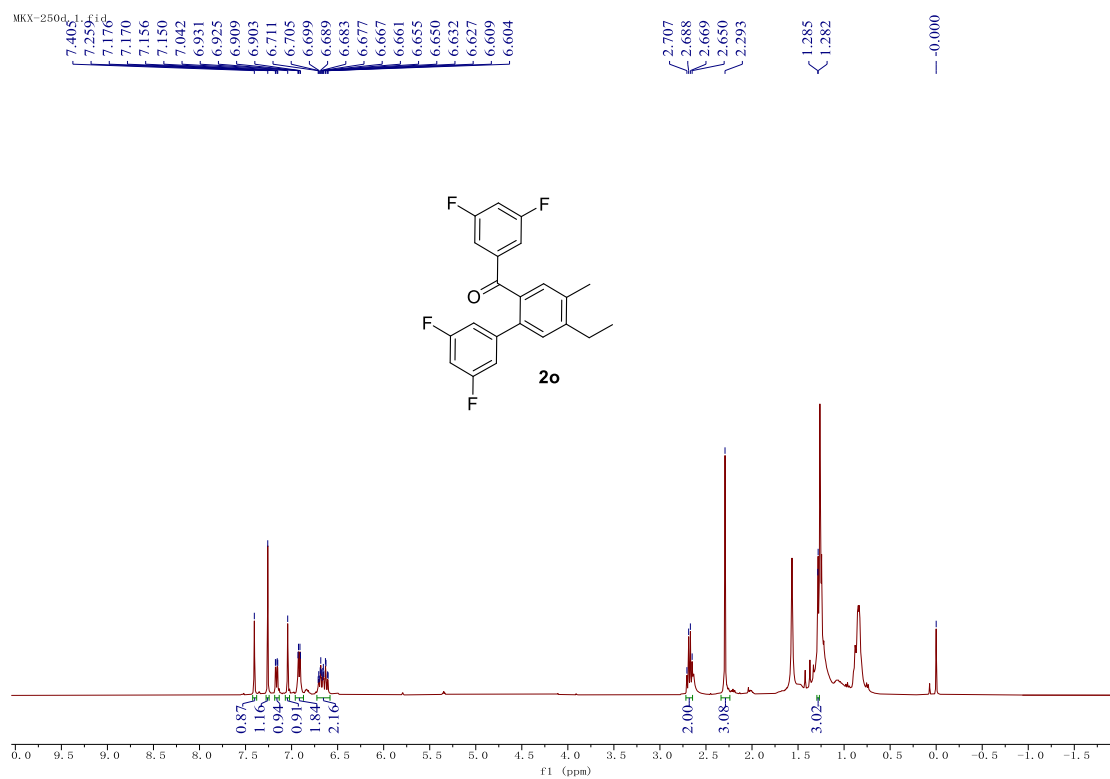

<sup>13</sup>C NMR (101 MHz, CDCl<sub>3</sub>) for **2o**

MKX-250d. 2. f1d

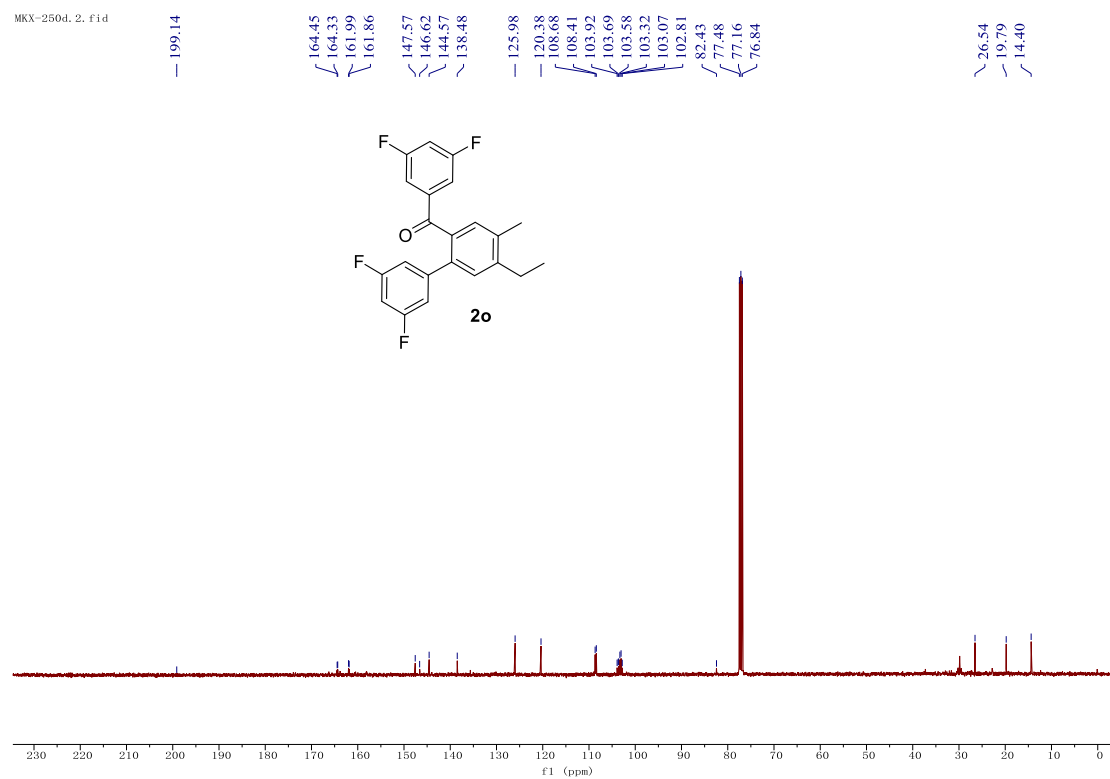

<sup>19</sup>F NMR (376 MHz, CDCl<sub>3</sub>) for **2o**

MKX-250d. 3. f1d

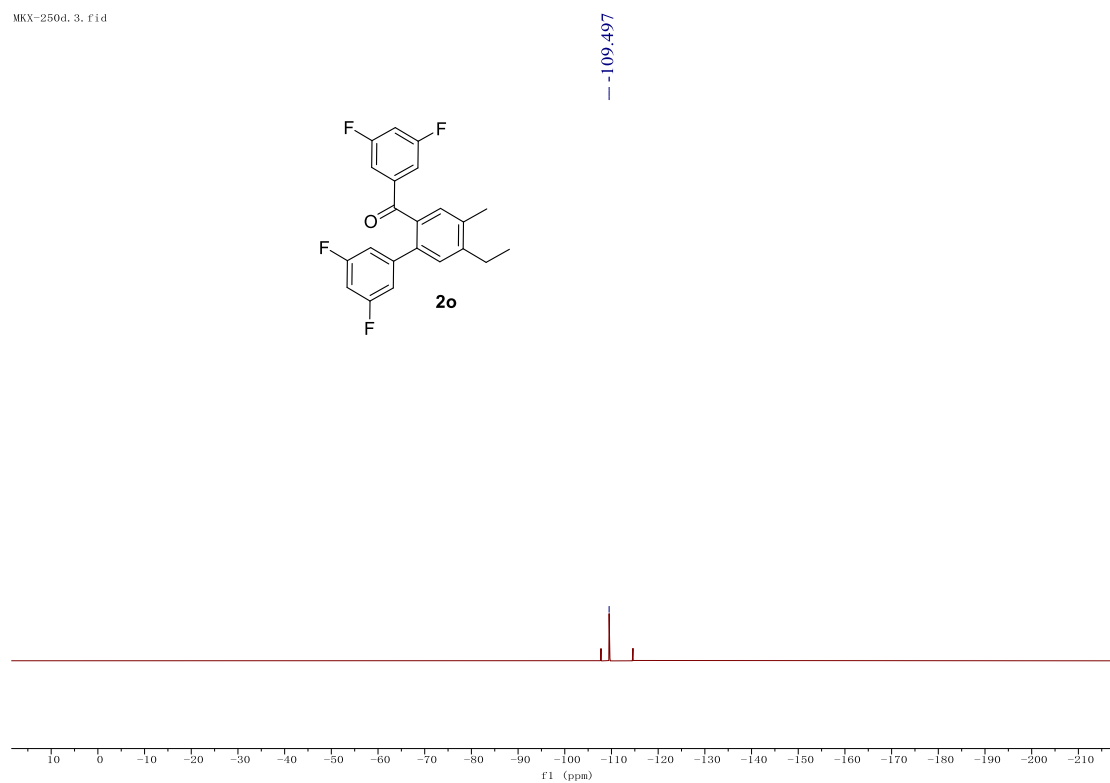



### <sup>1</sup>H NMR (400 MHz, CDCl<sub>3</sub>) for **2p**

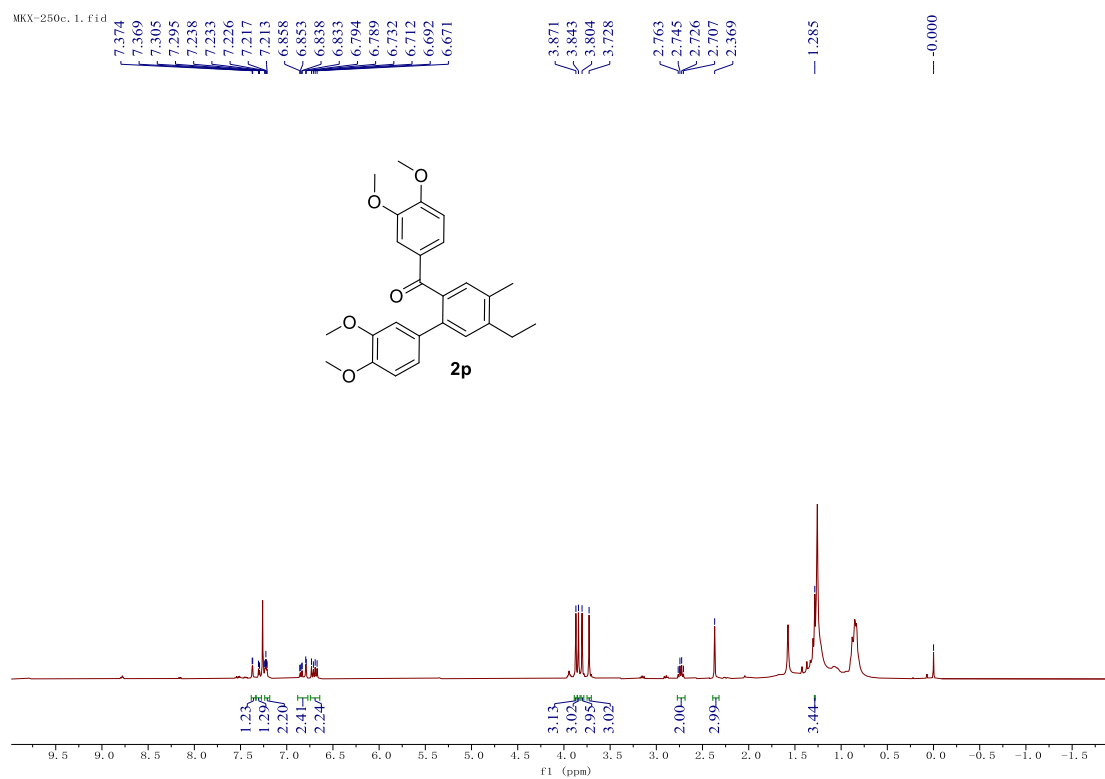

### <sup>13</sup>C NMR (101 MHz, CDCl<sub>3</sub>) for **2p**

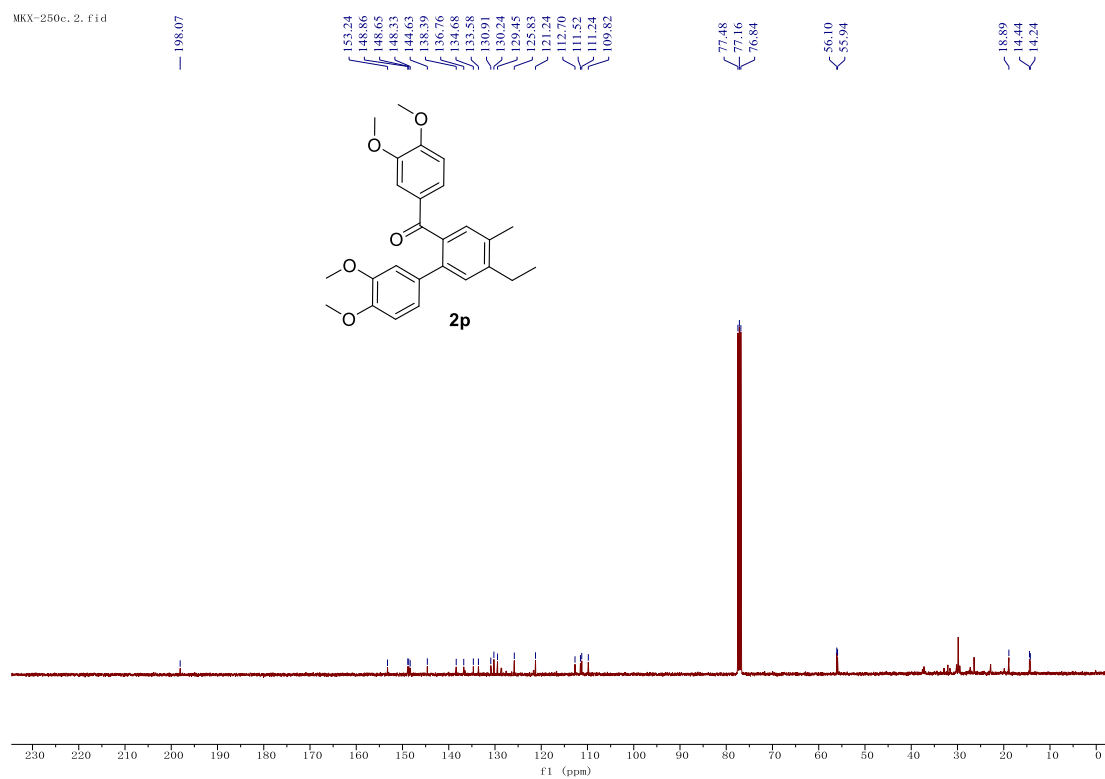

### <sup>1</sup>H NMR (400 MHz, CDCl<sub>3</sub>) for 2q

MX-1H. 4. fid  
MX-231c

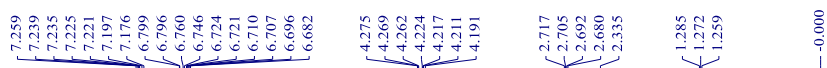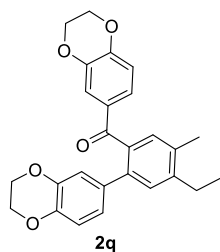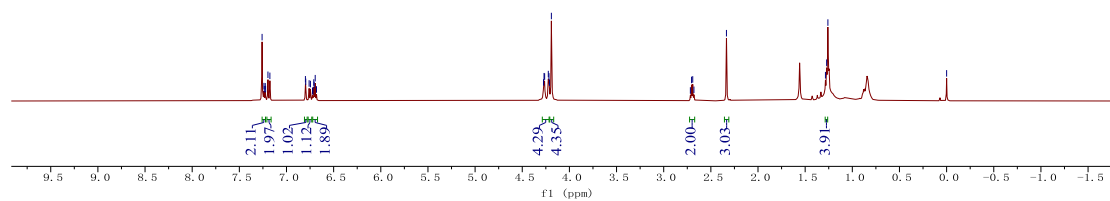

### <sup>13</sup>C NMR (101 MHz, CDCl<sub>3</sub>) for 2q

MX-13C. 4. fid  
MX-231C

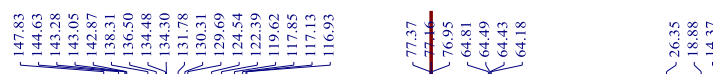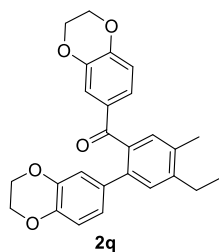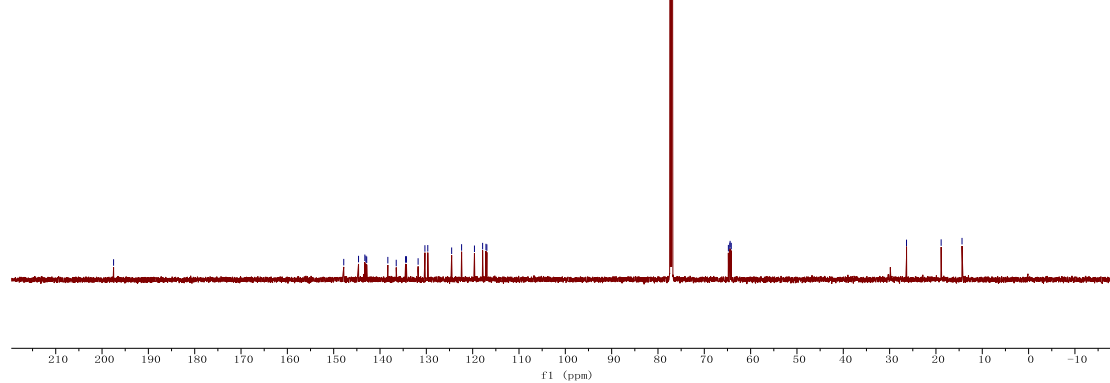

### <sup>1</sup>H NMR (400 MHz, CDCl<sub>3</sub>) for 2r

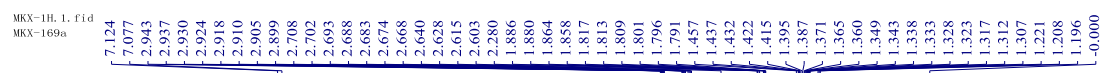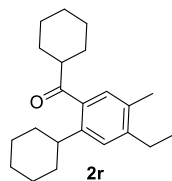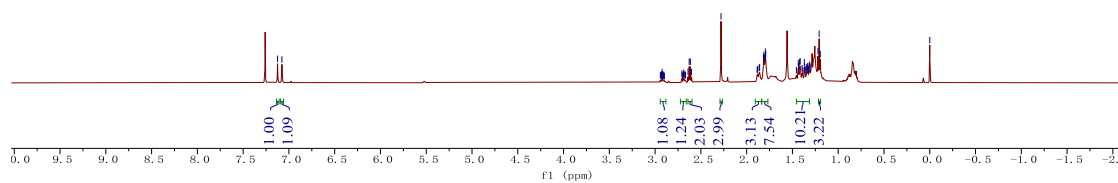

### <sup>13</sup>C NMR (101 MHz, CDCl<sub>3</sub>) for 2r

MKX-13C. 12. f1d  
MKX-169a

144.69  
144.18  
137.54  
132.82  
128.20  
126.74

77.37  
77.16  
76.95

50.30  
40.48  
34.99  
29.04  
27.11  
26.55  
26.39  
26.10  
26.00  
18.87  
14.44

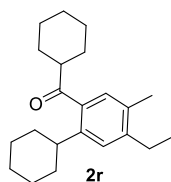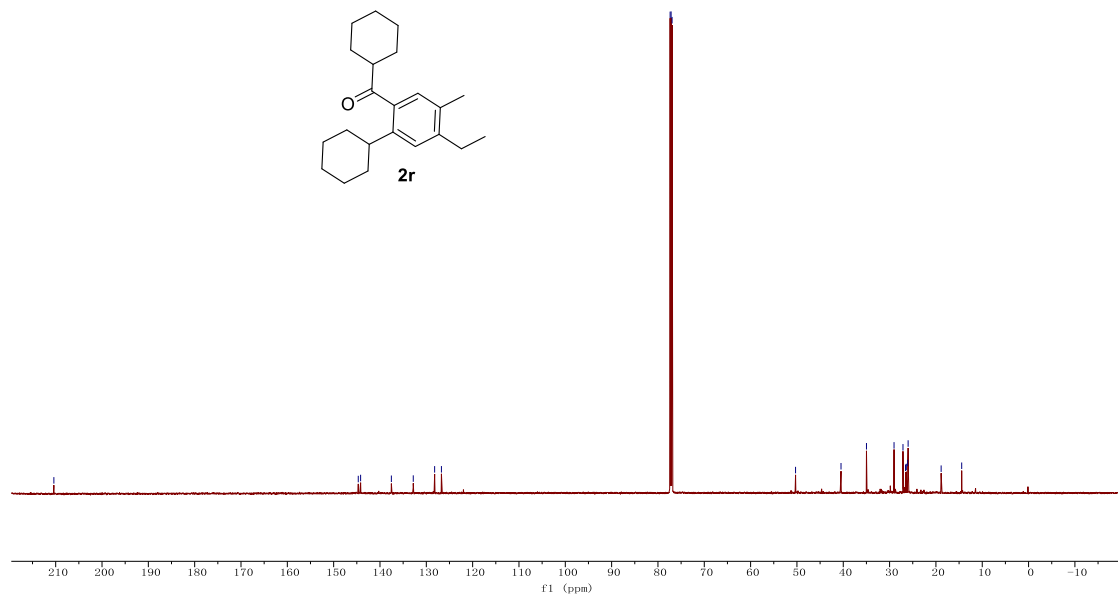

### <sup>1</sup>H NMR (400 MHz, CDCl<sub>3</sub>) for **2s**

MX-1H-69.fid  
MX-151a-2

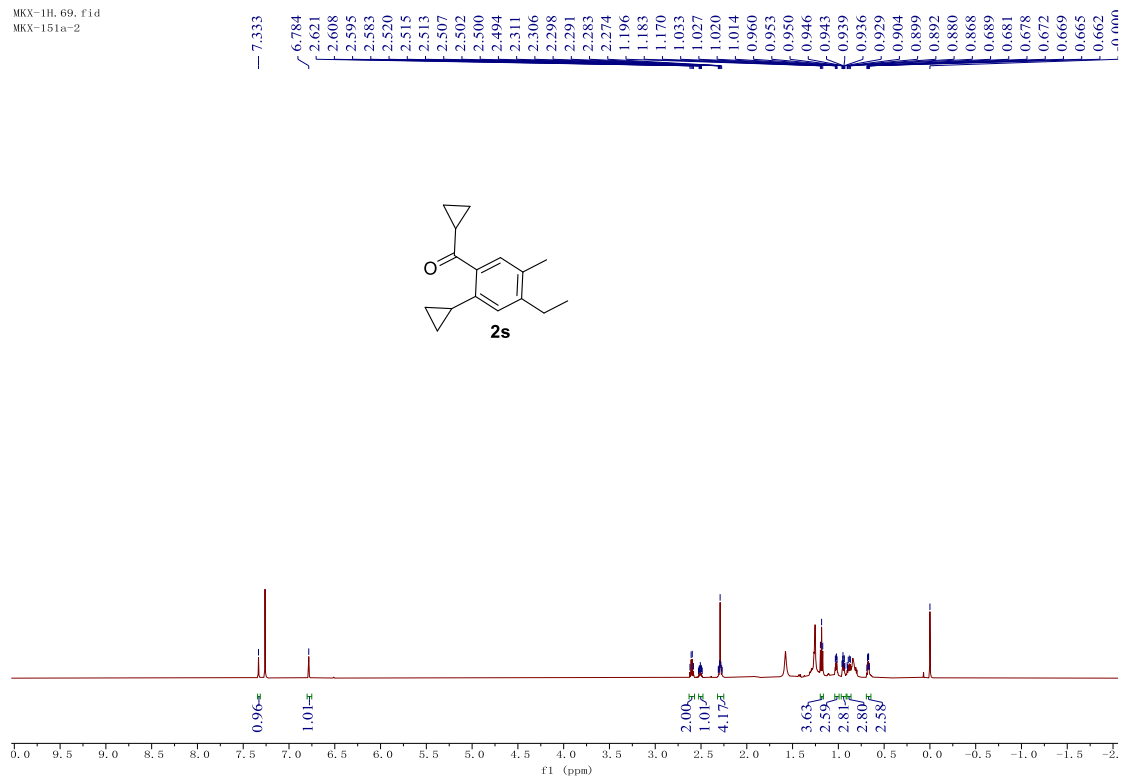

### <sup>13</sup>C NMR (101 MHz, CDCl<sub>3</sub>) for **2s**

MX-13C-6.fid  
MX-151a-2

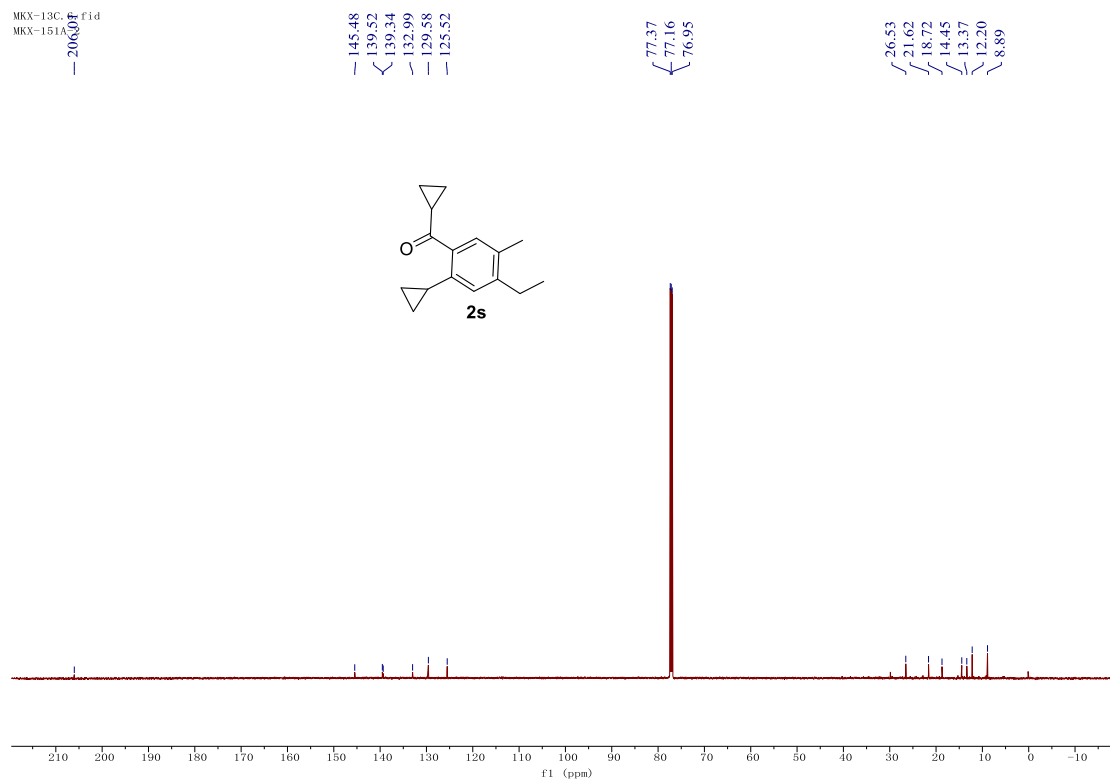

### <sup>1</sup>H NMR (400 MHz, CDCl<sub>3</sub>) for **2t**

MRX-1H. 2. f1  
MRX-169c

7.658  
7.645  
7.391  
7.379  
7.367  
7.325  
7.262  
7.256  
7.249  
7.241  
7.236  
7.229  
7.181  
7.169  
7.156  
7.125  
7.116  
7.113

2.749  
2.737  
2.724  
2.719  
2.710  
2.706  
2.703  
2.693  
1.716  
1.703  
1.690  
1.677  
1.293  
1.284  
1.274  
1.049  
1.036  
1.024

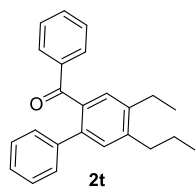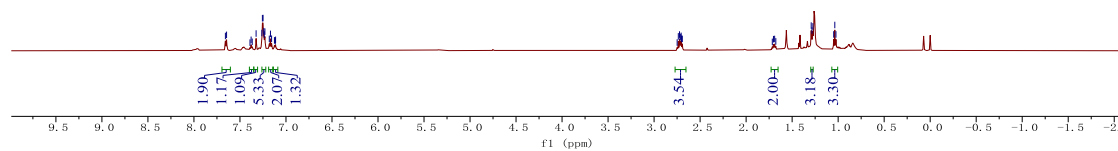

### <sup>13</sup>C NMR (101 MHz, CDCl<sub>3</sub>) for **2t**

MRX-13C. 13. f1  
MRX-169c

143.13  
141.08  
140.62  
138.87  
137.90  
136.67  
132.68  
130.99  
130.10  
129.19  
129.14  
128.27  
128.09  
127.10

77.37  
77.16  
76.95

34.89  
25.50  
24.27  
15.52  
14.39

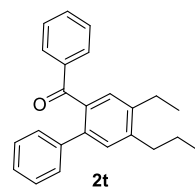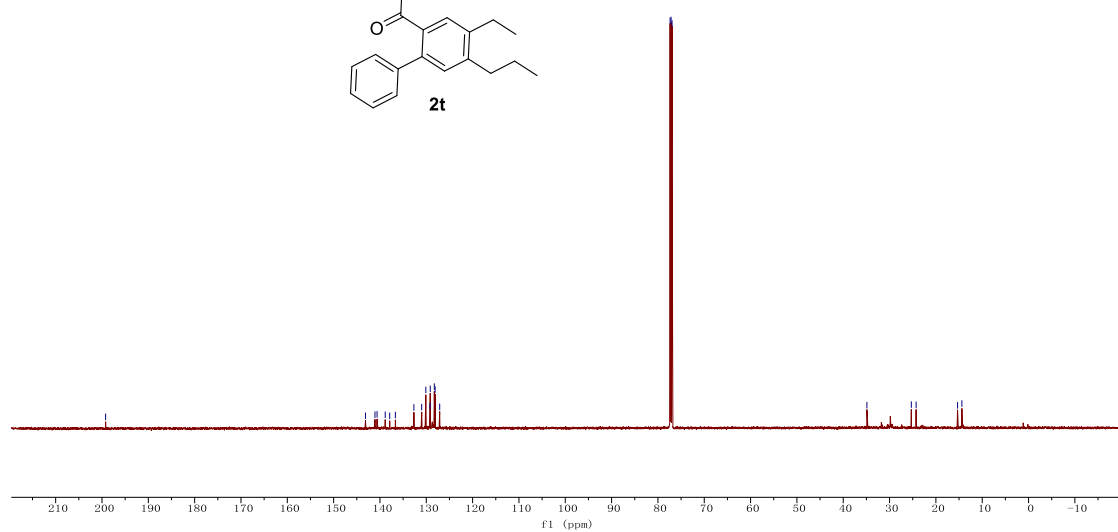

<sup>1</sup>H NMR (400 MHz, CDCl<sub>3</sub>) for **2u**

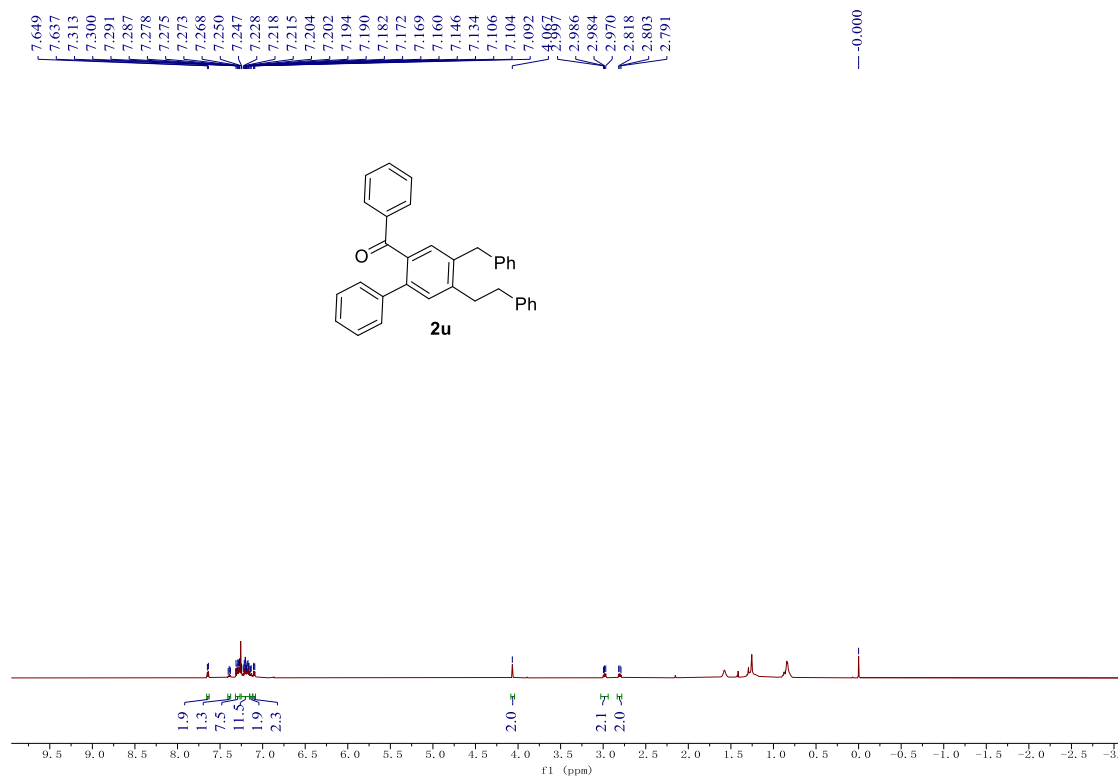

<sup>13</sup>C NMR (101 MHz, CDCl<sub>3</sub>) for **2u**

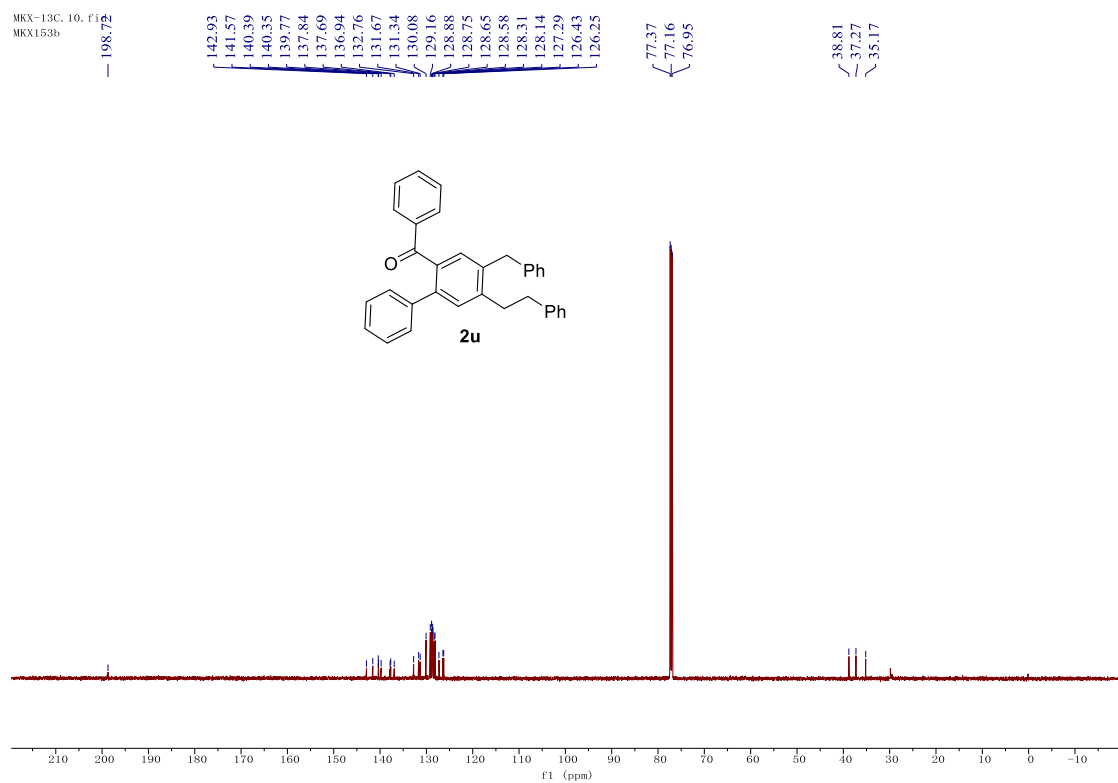

<sup>1</sup>H NMR (400 MHz, CDCl<sub>3</sub>) for **2v**

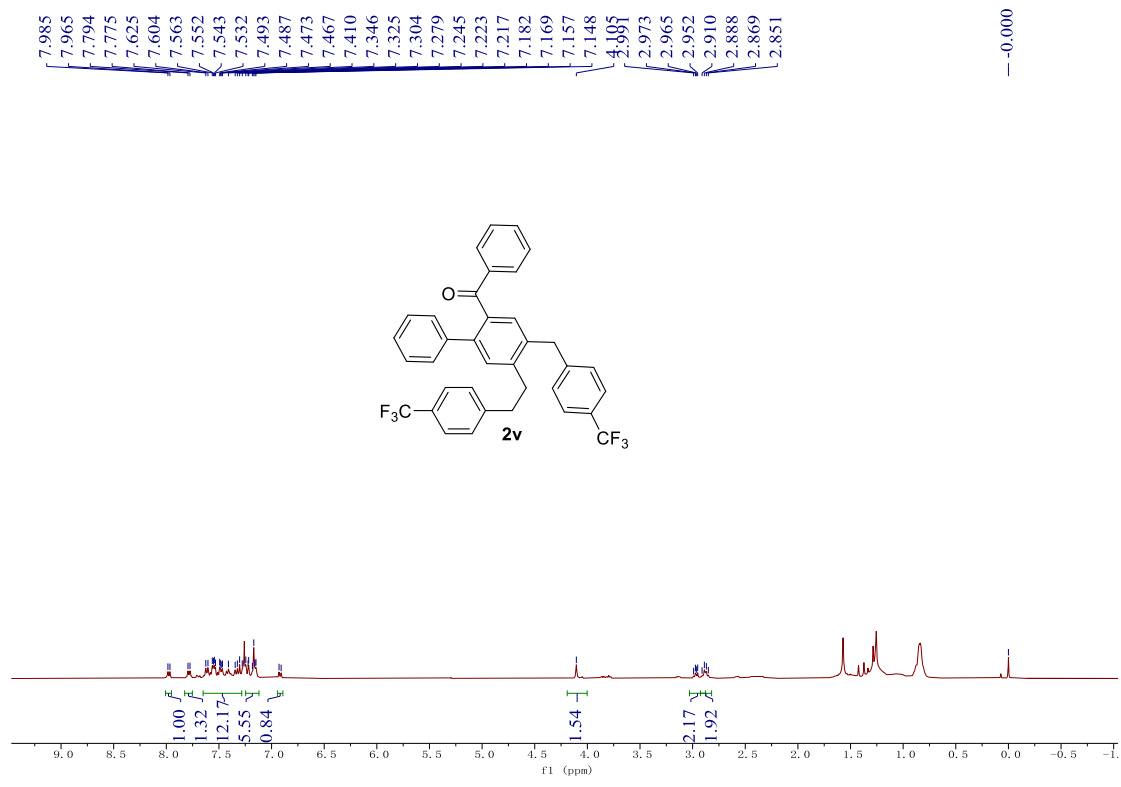

<sup>13</sup>C NMR (101 MHz, CDCl<sub>3</sub>) for **2v**

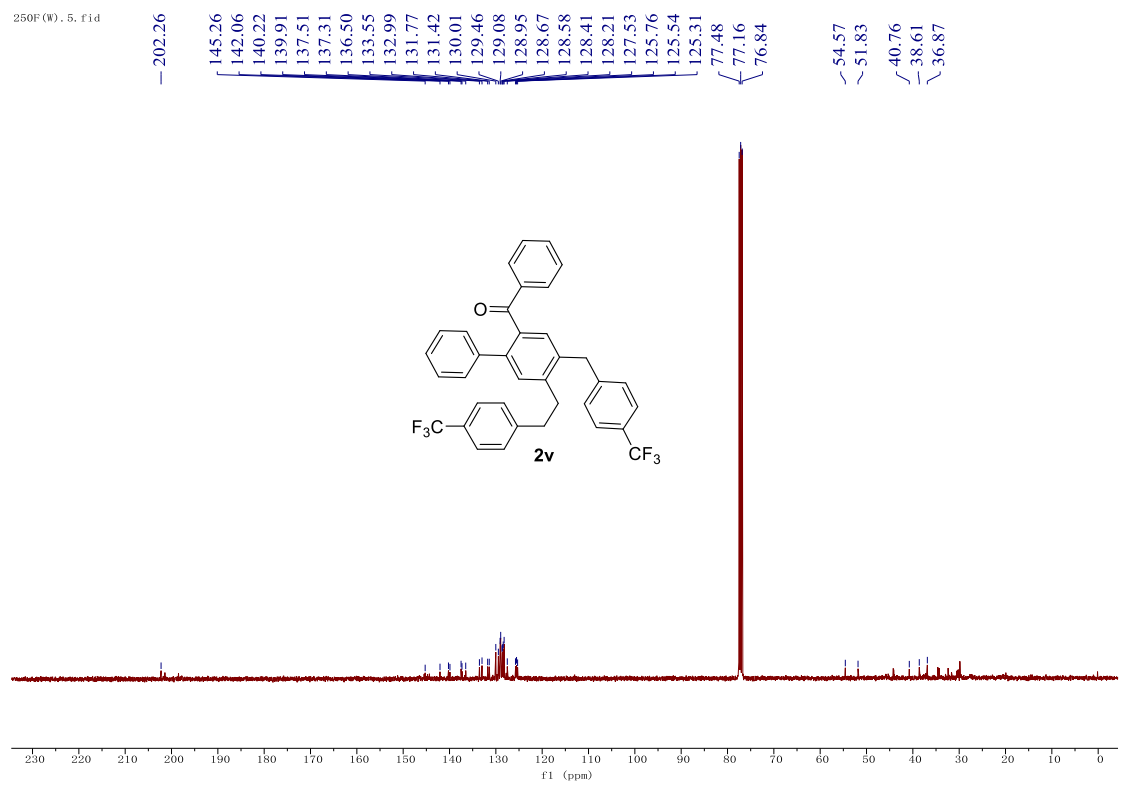

<sup>19</sup>F NMR (376 MHz, CDCl<sub>3</sub>) for **2v**

250F(W). 4. fid

-62.381  
-62.415

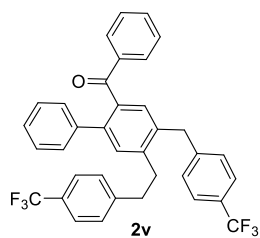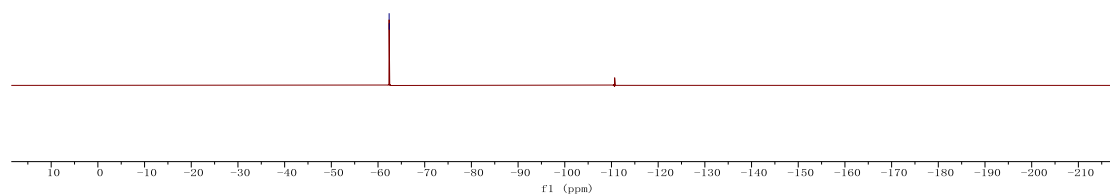

<sup>1</sup>H NMR (400 MHz, DMSO-*d*<sub>6</sub>) for **2w**

MRX-1H\_97.fid  
MRX-157d

8.638  
8.631  
7.922  
7.920  
7.918  
7.908  
7.906  
7.904  
7.889  
7.885  
7.885  
7.858  
7.855  
7.845  
7.842  
7.832  
7.829  
7.779  
7.776  
7.776  
7.320  
7.318  
7.312  
7.310  
7.307  
7.305  
7.299  
7.297  
7.250  
7.257  
3.333  
2.687  
2.674  
2.662  
2.649  
2.315  
1.220  
1.207  
1.195

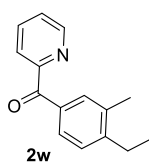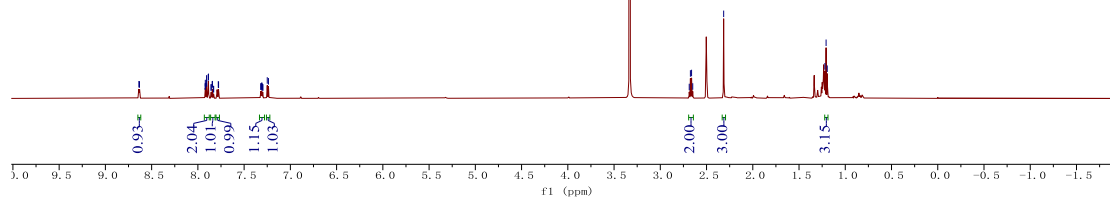



<sup>13</sup>C NMR (101 MHz, DMSO-*d*<sub>6</sub>) for **2w**

MX-13C. 11. f1d  
MX-163A

156.70  
149.86  
142.70  
137.55  
136.99  
136.97  
130.80  
126.45  
124.51  
122.65  
120.35

40.29  
40.15  
40.01  
39.87

19.05  
14.90

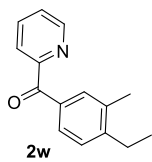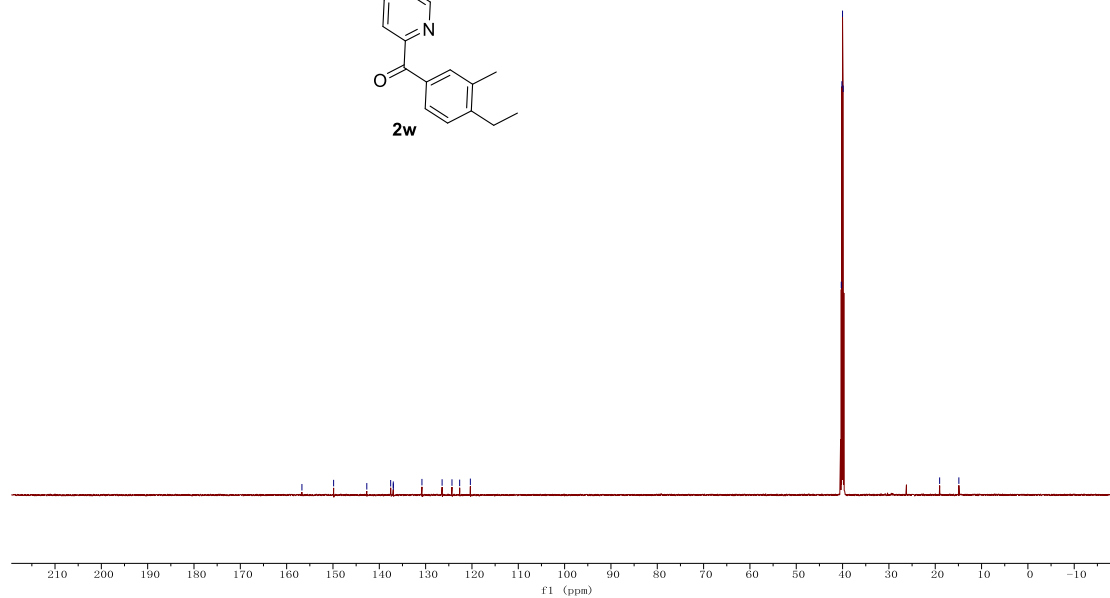

Supplement: d4cc02458c1.pdf [file d4cc02458c1.pdf]
